# Supplementary material
Source: PubMed Central journal article supplement (PMC3783240)
Supplement: supp_mct176_mct176supp_figs.pdf [file supp_mct176_mct176supp_figs.pdf]

## SUPPLEMENTARY DATA

FIG. S1: Three habitats were defined according to elevation, water-logging and soil drainage conditions. Sampled mother trees are indicated by red circles and numbers.

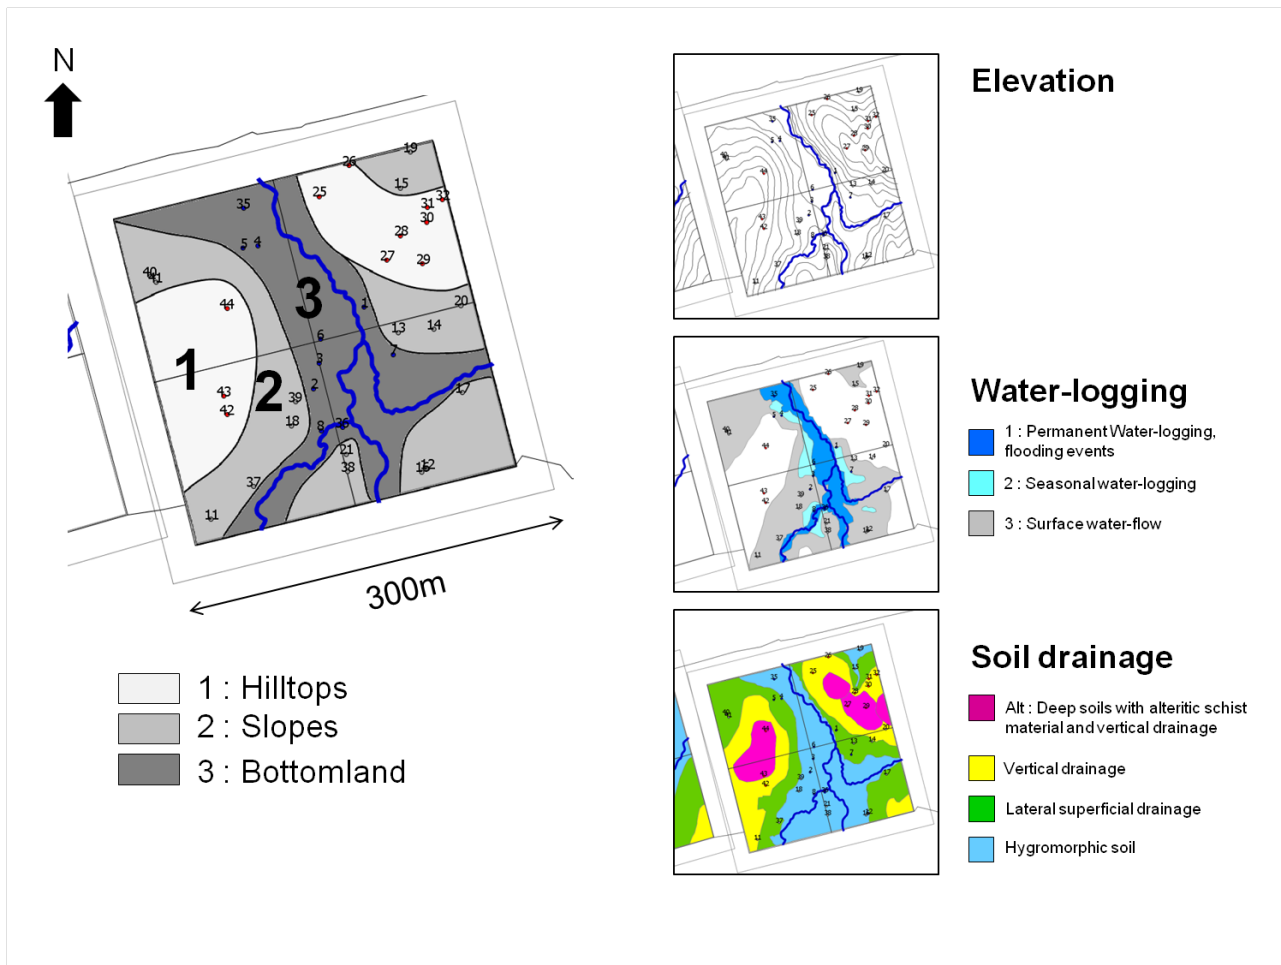

FIG. S2: relative size of different effects on trait variability (seed mass effect is not displayed here and therefore the bars do not sum to 100%).

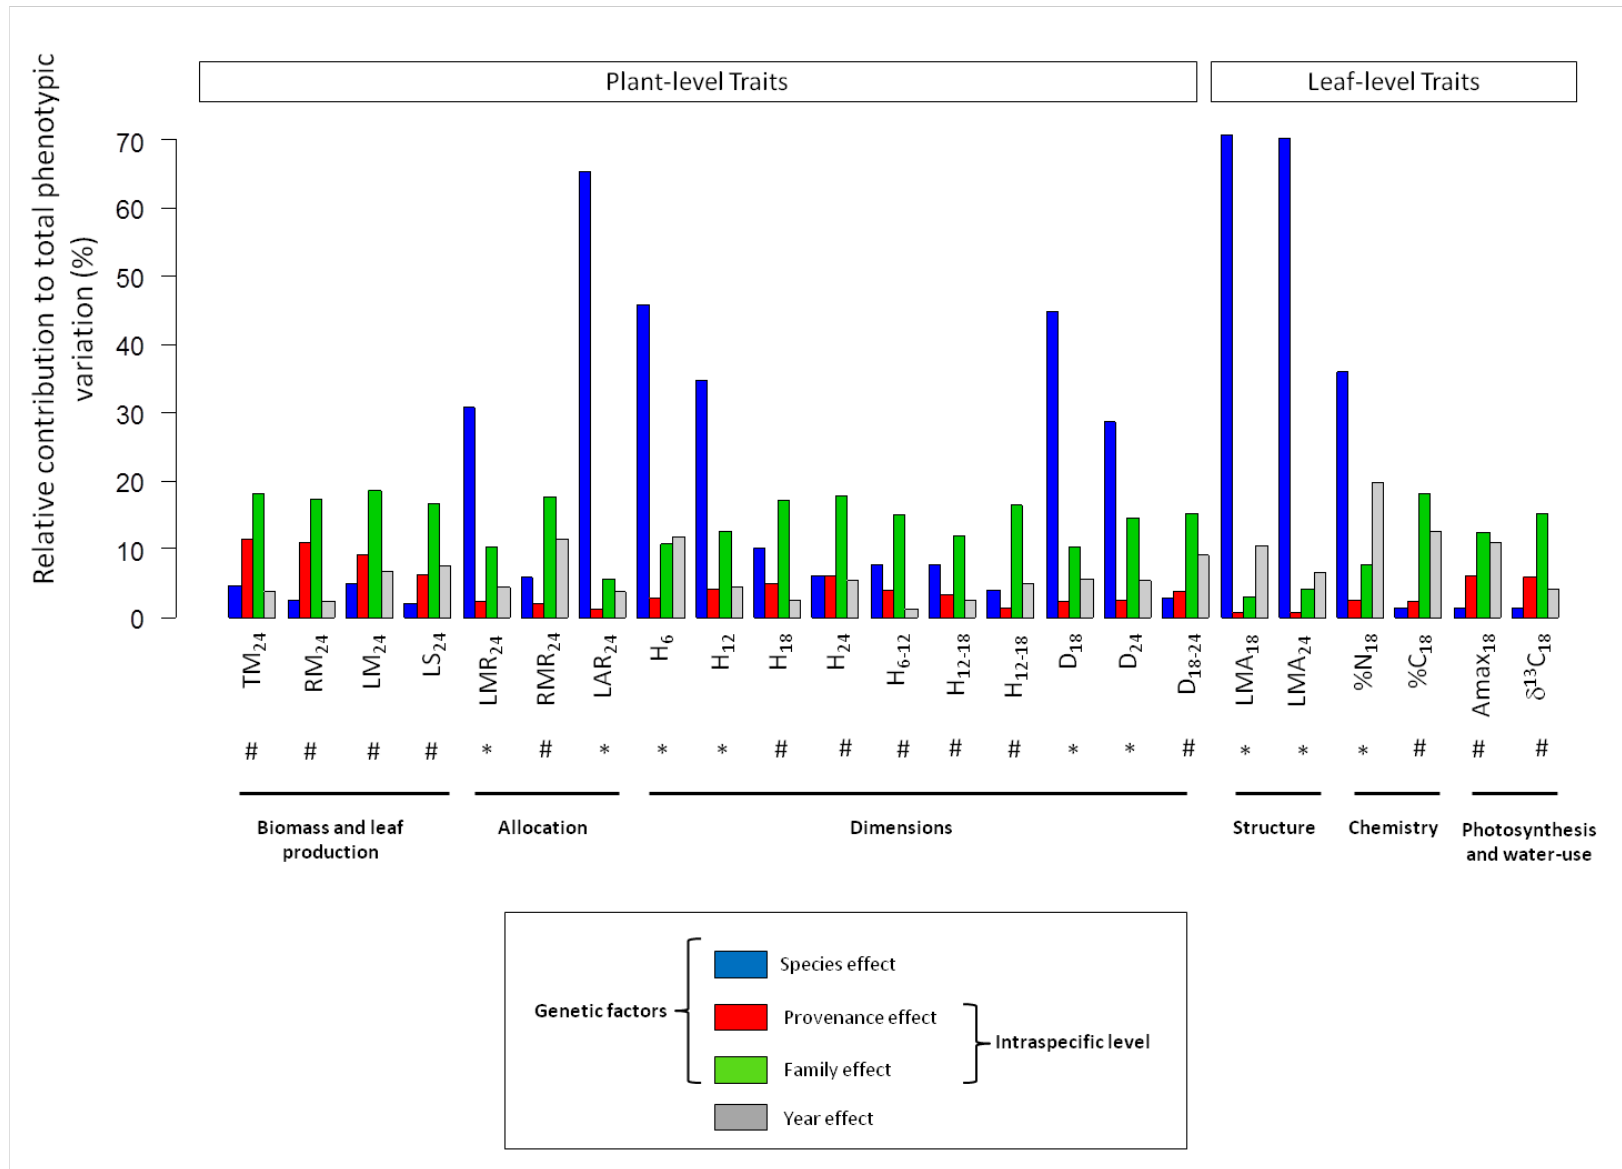

FIG. S3: Pearson's correlation between phenotypic traits at seedling and maternal family level for *Eperua falcata*. Colours indicate the sign and strength of significant correlations (blue = negative correlation; red = positive correlation; deeper colours indicate stronger correlation). Empty cells correspond to non significant correlations ( $\alpha = 5\%$ ). Significance levels: \* = 5%; \*\* = 1% or less. FDR: seedling level: 0.07% ( $\alpha = 5\%$ ) and 0.01% ( $\alpha = 1\%$ ); maternal family level: 0.4% ( $\alpha = 5\%$ ) and 0.06% ( $\alpha = 1\%$ ).

|        | H6      | H12     | H18     | H24     | D18     | D24     | H612    | H1218   | H1824   | D1824   | LMA18   | LMA24   | Amax18  | d13C18  | N18     | C18     | LA      | LM      | RM      | TM      | LAR     | LMR     | RMR     |
|--------|---------|---------|---------|---------|---------|---------|---------|---------|---------|---------|---------|---------|---------|---------|---------|---------|---------|---------|---------|---------|---------|---------|---------|
| H6     |         | 0.91**  | 0.86**  | 0.83**  | 0.88**  | 0.77**  | 0.77**  | 0.82**  | 0.47**  |         |         |         | 0.55**  | 0.82**  |         |         | 0.75**  | 0.77**  | 0.71**  | 0.79**  | -0.46** | -0.42** | -0.57** |
| H12    | 0.78**  |         | 0.97**  | 0.87**  | 0.93**  | 0.81**  | 0.97**  | 0.8**   | 0.49**  |         |         |         | 0.71**  | 0.9**   |         |         | 0.77**  | 0.79**  | 0.74**  | 0.82**  | -0.47** | -0.41*  | -0.62** |
| H18    | 0.61**  | 0.88**  |         | 0.88**  | 0.93**  | 0.84**  | 0.96**  | 0.9**   | 0.51**  | 0.34*   |         |         | 0.73**  | 0.9**   |         |         | 0.81**  | 0.83**  | 0.78**  | 0.85**  | -0.4*   | -0.34*  | -0.63** |
| H24    | 0.57**  | 0.8**   | 0.92**  |         | 0.88**  | 0.92**  | 0.82**  | 0.74**  | 0.75**  | 0.48**  |         |         | 0.69**  | 0.78**  |         |         | 0.92**  | 0.92**  | 0.84**  | 0.92**  |         |         | -0.76** |
| D18    | 0.67**  | 0.84**  | 0.81**  | 0.73**  |         | 0.9*    | 0.89**  | 0.76**  | 0.53**  |         |         |         | 0.76**  | 0.81**  |         |         | 0.81**  | 0.85**  | 0.85**  | 0.9**   | -0.5**  | -0.47** | -0.63** |
| D24    | 0.61**  | 0.79**  | 0.84**  | 0.83**  | 0.86**  |         | 0.78**  | 0.72**  | 0.65**  | 0.59**  |         |         | 0.7**   | 0.73**  |         |         | 0.86**  | 0.87**  | 0.88**  | 0.91**  | -0.39*  | -0.37*  | -0.63** |
| H612   | 0.41**  | 0.89**  | 0.84**  | 0.74**  | 0.74**  | 0.71**  |         | 0.84**  | 0.46**  |         |         |         | 0.75**  | 0.87**  |         |         | 0.72**  | 0.75**  | 0.71**  | 0.79**  | -0.43** | -0.36*  | -0.61** |
| H1218  | 0.23**  | 0.47**  | 0.83**  | 0.78**  | 0.51**  | 0.63**  | 0.52**  |         | 0.38*   | 0.36*   |         |         | 0.68**  | 0.81**  |         |         | 0.73**  | 0.74**  | 0.73**  | 0.76**  |         |         | -0.49** |
| H1824  | 0.22**  | 0.24**  | 0.31**  | 0.66**  | 0.23**  | 0.39**  | 0.18**  | 0.3**   |         | 0.62**  |         |         | 0.52**  |         |         |         | 0.71**  | 0.68**  | 0.58**  | 0.64**  |         |         | -0.54** |
| D1824  | 0.25**  | 0.36**  | 0.49**  | 0.56**  | 0.26**  | 0.72**  | 0.34**  | 0.5**   | 0.41**  |         |         |         | 0.35*   |         |         |         | 0.46**  | 0.38*   | 0.38*   | 0.37*   |         |         |         |
| LMA18  | 0.19**  | 0.1**   |         | -0.08** | 0.2**   |         |         | -0.22** | -0.1**  | -0.17** |         | 0.35*   |         |         |         |         |         |         |         |         | -0.48** | -0.38*  |         |
| LMA24  |         | 0.07**  | 0.07**  |         | 0.23**  | 0.15**  | 0.11**  |         | -0.23** |         | 0.36**  |         |         |         |         |         |         |         |         |         | -0.62** | -0.5**  | 0.47**  |
| Amax18 | 0.23**  | 0.43**  | 0.59**  | 0.63**  | 0.39**  | 0.52**  | 0.45**  | 0.6**   | 0.39**  | 0.45**  | -0.19** | -0.07*  |         | 0.58**  |         |         | 0.56**  | 0.59**  | 0.65**  | 0.67**  | -0.4*   | -0.41*  | -0.51** |
| d13C18 | 0.37**  | 0.52**  | 0.58**  | 0.52**  | 0.6**   | 0.54**  | 0.49**  | 0.47**  | 0.15**  | 0.22**  | 0.09**  | 0.19**  | 0.3**   |         |         | 0.37*   | 0.72**  | 0.73**  | 0.62**  | 0.71**  | -0.38*  |         | -0.64** |
| N18    | 0.35**  | 0.3**   | 0.26**  | 0.31**  | 0.18**  | 0.26**  | 0.19**  | 0.14**  | 0.25**  | 0.25**  | 0.09**  | -0.18** | 0.27**  | 0.1**   |         | 0.36*   |         |         |         |         |         |         |         |
| C18    | 0.18**  | 0.19**  | 0.16**  | 0.15**  | 0.16**  | 0.16**  | 0.13**  | 0.07**  | 0.06**  | 0.09**  |         |         | 0.15**  | 0.11**  | 0.13**  |         |         |         |         |         |         |         |         |
| LA     | 0.56**  | 0.7**   | 0.76**  | 0.85**  | 0.67**  | 0.79**  | 0.61**  | 0.58**  | 0.6**   | 0.56**  |         | -0.1**  | 0.53**  | 0.45**  | 0.35**  | 0.14**  |         | 0.98**  | 0.88**  | 0.94**  |         |         | -0.68** |
| LM     | 0.58**  | 0.73**  | 0.78**  | 0.85**  | 0.72**  | 0.81**  | 0.64**  | 0.6**   | 0.56**  | 0.55**  |         |         | 0.53**  | 0.48**  | 0.34**  | 0.14**  | 0.99**  |         | 0.9**   | 0.97**  |         |         | -0.7**  |
| RM     | 0.59**  | 0.79**  | 0.84**  | 0.81**  | 0.83**  | 0.84**  | 0.73**  | 0.62**  | 0.36**  | 0.46**  |         | 0.11**  | 0.51**  | 0.53**  | 0.21**  | 0.2**   | 0.82**  | 0.85**  |         | 0.97**  | -0.48** | -0.44** | -0.45** |
| TM     | 0.59**  | 0.82**  | 0.88**  | 0.88**  | 0.82**  | 0.89**  | 0.76**  | 0.88**  | 0.44**  | 0.55**  |         | 0.11**  | 0.54**  | 0.54**  | 0.25**  | 0.18**  | 0.9**   | 0.93**  | 0.95**  |         | -0.39** | -0.33*  | -0.62** |
| LAR    | -0.23** | -0.35** | -0.33** | -0.18** | -0.45** | -0.34** | -0.33** | -0.21** | 0.24**  |         | -0.25** | -0.51** | -0.06*  | -0.31** | 0.17**  | -0.13** | 0.07*   |         | -0.32** | -0.26** |         | 0.93**  |         |
| LMR    | -0.21** | -0.32** | -0.32** | -0.15** | -0.41** | -0.31** | -0.32** | -0.21** | 0.23**  |         | -0.11** | -0.36** | -0.06*  | -0.27** | 0.18**  | -0.16** | 0.09**  |         | -0.31** | -0.24** | 0.92**  |         |         |
| RMR    | -0.25** | -0.38** | -0.5**  | -0.59** | -0.3**  | -0.49** | -0.38** | -0.49** | -0.47** | -0.52** | 0.2**   | 0.11**  | -0.47** | -0.24** | -0.32** |         | -0.58** | -0.57** | -0.29** | -0.49** | -0.31** | -0.35** |         |

FIGURE S4: Pearson's correlation between phenotypic traits at seedling and maternal family level for *Eperua grandiflora*. Colours indicate the sign and strength of significant correlations (blue = negative correlation; red = positive correlation; deeper colours indicate stronger correlation). Empty cells correspond to non significant correlations ( $\alpha = 5\%$ ). Significance levels: \* = 5%; \*\* = 1% or less. FDR: seedling level: 0.2% ( $\alpha = 5\%$ ) and 0.04% ( $\alpha = 1\%$ ); maternal family level: 1.2% ( $\alpha = 5\%$ ) and 0.3% ( $\alpha = 1\%$ ).

|        | H6      | H12     | H18     | H24     | D18     | D24     | H612    | H1218   | H1824   | D1824   | LMA18   | LMA24   | Amax18  | d13C18  | N18     | C18    | LA      | LM      | RM      | TM      | LAR     | LMR     | RMR    |        |         |
|--------|---------|---------|---------|---------|---------|---------|---------|---------|---------|---------|---------|---------|---------|---------|---------|--------|---------|---------|---------|---------|---------|---------|--------|--------|---------|
| H6     |         | 0.91**  | 0.89**  | 0.69*   | 0.78**  | 0.86**  |         |         |         |         |         |         |         |         |         |        |         |         |         |         |         |         |        | -0.67* |         |
| H12    | 0.83**  |         | 0.93**  | 0.85**  | 0.89**  | 0.81**  | 0.8**   |         |         |         |         |         |         |         |         |        | 0.77**  | 0.73*   | 0.79**  | 0.81**  |         |         |        |        | -0.81** |
| H18    | 0.71**  | 0.85**  |         | 0.94**  | 0.71*   | 0.73*   | 0.76**  | 0.8**   |         |         |         |         |         |         |         |        | 0.9**   | 0.86**  | 0.85**  | 0.9**   |         |         |        |        | -0.86** |
| H24    | 0.62**  | 0.78**  | 0.91**  |         | 0.65*   | 0.7*    | 0.72*   | 0.81**  | 0.71*   |         |         |         |         |         |         |        | 0.95**  | 0.93**  | 0.9**   | 0.94**  |         |         |        |        | -0.88** |
| D18    | 0.72**  | 0.79**  | 0.69**  | 0.59**  |         | 0.77**  | 0.76**  |         |         |         |         |         |         |         |         |        |         |         | 0.73*   | 0.68*   |         |         |        |        |         |
| D24    | 0.88**  | 0.78**  | 0.74**  | 0.7**   | 0.85**  |         |         |         |         | 0.69*   |         |         |         |         |         | 0.67*  |         |         |         |         |         |         |        |        | -0.71*  |
| H612   | 0.39**  | 0.84**  | 0.7**   | 0.67**  | 0.61**  | 0.64**  |         |         |         |         |         |         |         |         |         |        | 0.77**  | 0.76**  | 0.73*   | 0.77**  |         |         |        |        | -0.7*   |
| H1218  | 0.24**  | 0.29**  | 0.74**  | 0.68**  | 0.24**  | 0.36**  | 0.2**   |         | 0.79**  |         | -0.8**  | -0.77** | 0.71*   |         |         |        | 0.82**  | 0.81**  | 0.7*    | 0.76**  |         |         |        |        | -0.68*  |
| H1824  |         | 0.18**  | 0.2**   | 0.58**  |         | 0.21**  | 0.22**  | 0.14*   |         |         |         | -0.93** | 0.79**  |         |         |        | 0.73*   | 0.74**  |         |         |         | 0.65*   |        |        |         |
| D1824  | 0.26**  | 0.35**  | 0.43**  | 0.49**  | 0.19**  | 0.68**  | 0.34**  | 0.33**  | 0.32**  |         |         |         |         |         |         | 0.65*  |         |         |         |         |         |         |        |        |         |
| LMA18  | 0.19**  |         |         |         | 0.24**  |         |         | -0.22** |         | -0.14*  |         | 0.63*   |         |         |         |        |         |         |         |         |         |         |        |        |         |
| LMA24  | 0.24**  | 0.19**  |         |         | 0.33**  | 0.28**  |         | -0.14*  | -0.26** |         | 0.42**  |         | -0.72*  |         |         |        | -0.63*  | -0.63*  |         |         |         | -0.62** | -0.8** |        |         |
| Amax18 |         | 0.19**  | 0.3**   | 0.4**   | 0.19**  | 0.29**  | 0.25**  | 0.31**  | 0.37**  | 0.29**  |         |         |         |         |         |        |         | 0.62*   |         |         |         |         |        |        |         |
| d13C18 | 0.44**  | 0.4**   | 0.41**  | 0.37**  | 0.41**  | 0.41**  | 0.23**  | 0.22**  |         | 0.2**   |         | 0.22**  |         |         |         |        |         |         |         |         |         |         |        |        | -0.67*  |
| N18    | -0.15*  | -0.18** | -0.17** |         | -0.14*  | -0.12*  | -0.13*  |         | 0.17**  |         |         |         |         |         |         |        |         |         |         |         | -0.68*  | -0.65*  |        |        |         |
| C18    |         |         | 0.15*   |         |         |         | 0.14*   |         |         |         | -0.29** |         |         | 0.17**  | -0.24** |        |         |         |         |         |         |         |        |        |         |
| LA     | 0.48**  | 0.64**  | 0.78**  | 0.86**  | 0.55**  | 0.64**  | 0.56**  | 0.61**  | 0.53**  | 0.41**  |         |         | 0.32**  | 0.29**  |         |        |         | 1**     | 0.89**  | 0.95**  |         |         |        |        | -0.83** |
| LM     | 0.52**  | 0.67**  | 0.8**   | 0.87**  | 0.6**   | 0.68**  | 0.59**  | 0.61**  | 0.49**  | 0.42**  |         |         | 0.32**  | 0.32**  |         |        | 0.86**  |         | 0.9**   | 0.96**  |         |         |        |        | -0.79** |
| RM     | 0.69**  | 0.79**  | 0.77**  | 0.72**  | 0.8**   | 0.82**  | 0.62**  | 0.42**  | 0.17**  | 0.4**   | 0.15**  | 0.26**  | 0.25**  | 0.41**  |         |        | 0.72**  | 0.76**  |         | 0.98**  |         |         |        |        | -0.64*  |
| TM     | 0.68**  | 0.81**  | 0.87**  | 0.87**  | 0.77**  | 0.82**  | 0.67**  | 0.56**  | 0.35**  | 0.45**  |         | 0.14*   | 0.31**  | 0.44**  |         |        | 0.89**  | 0.92**  | 0.92**  |         |         |         |        |        | -0.75** |
| LAR    | -0.39** | -0.34** | -0.17** |         | -0.5**  | -0.39** | -0.19** |         | 0.35**  |         | -0.41** | -0.56** |         | -0.33** | 0.14*   |        | 0.2**   |         | -0.39** | -0.21** |         |         | 0.95** |        |         |
| LMR    | -0.34** | -0.27** |         |         | -0.41** | -0.32** | -0.13*  | 0.16**  | 0.35**  |         | -0.29** | -0.41** |         | -0.28** |         | -0.15* | 0.27**  | 0.23**  | -0.31** | -0.12*  | 0.94**  |         |        |        |         |
| RMR    | -0.18** | -0.28** | -0.42** | -0.53** | -0.16** | -0.24** | -0.29** | -0.41** | -0.45** | -0.22** | 0.2**   | 0.24**  | -0.25** |         |         |        | -0.53** | -0.52** |         | -0.38** | -0.45** | -0.49** |        |        |         |
