# Supplementary material
Source: PubMed Central journal article supplement (PMC3783240)
Supplement: supp_mct176_mct176supp_tables.pdf [file supp_mct176_mct176supp_tables.pdf]

## SUPPLEMENTARY DATA

### METHOD S1. Design of the incomplete randomized block experiments

Each block was made of sixteen seedlings from four different maternal families (four seedlings per family). To obtain this design, we proceeded as follows. Each block was randomly assigned to a given position in the glasshouse. Next, sets of four families were randomly assigned to blocks, then seedlings from each family were assigned to each block containing that family, and finally the sixteen seedlings belonging to a block were randomly assigned positions within the block. Seedlings were submitted to daily and seasonal natural variations of irradiance. They were maintained in non-limiting water conditions (i.e., soil water content close to field capacity, i.e. around  $0.20 \text{ m}^3 \text{ m}^{-3}$ ) throughout the experiment (i.e. 24 months) by watering the pots every second or third morning. Homogeneity of the environmental conditions in the glasshouse (i.e. air temperature, air humidity, radiation) was tested twice a year over a 3 week's period. Air temperature and humidity (average  $28.6 \pm 2.2 \text{ }^\circ\text{C}$  and  $72.7 \pm 8.6\%$ , respectively) were recorded at three different locations in the glasshouse using a temperature and relative humidity probe (HMP45, Yaisala, Helsinki, Finland) connected to a CR10X datalogger (Campbell Scientific Inc., Logan, UT, USA). Photosynthetic photon flux density (PPFD) was measured above each block using a linear PAR ceptometer (AccuPar, Decagon Devices, Pullman, WA, USA) and compared with incident photosynthetic photon flux density outside the glasshouse. This allowed calculating a value of relative irradiance for each block and an average relative irradiance in the glasshouse, which was about  $14.3 \pm 2.3 \%$  over the study period. To avoid any competition for light among the plants, pots were occasionally turned or their position swapped within the block if necessary to minimise vertical overlap of leaves between seedlings.

### METHOD 2. Bayesian model of phenotypic value decomposition

Phenotypic differences among species, habitats-of-provenance and maternal families were detected using a hierarchical linear model including seed mass effects and the three levels of genetic divergence (species, provenance, and families), as shown in the 'conceptual model' figure:

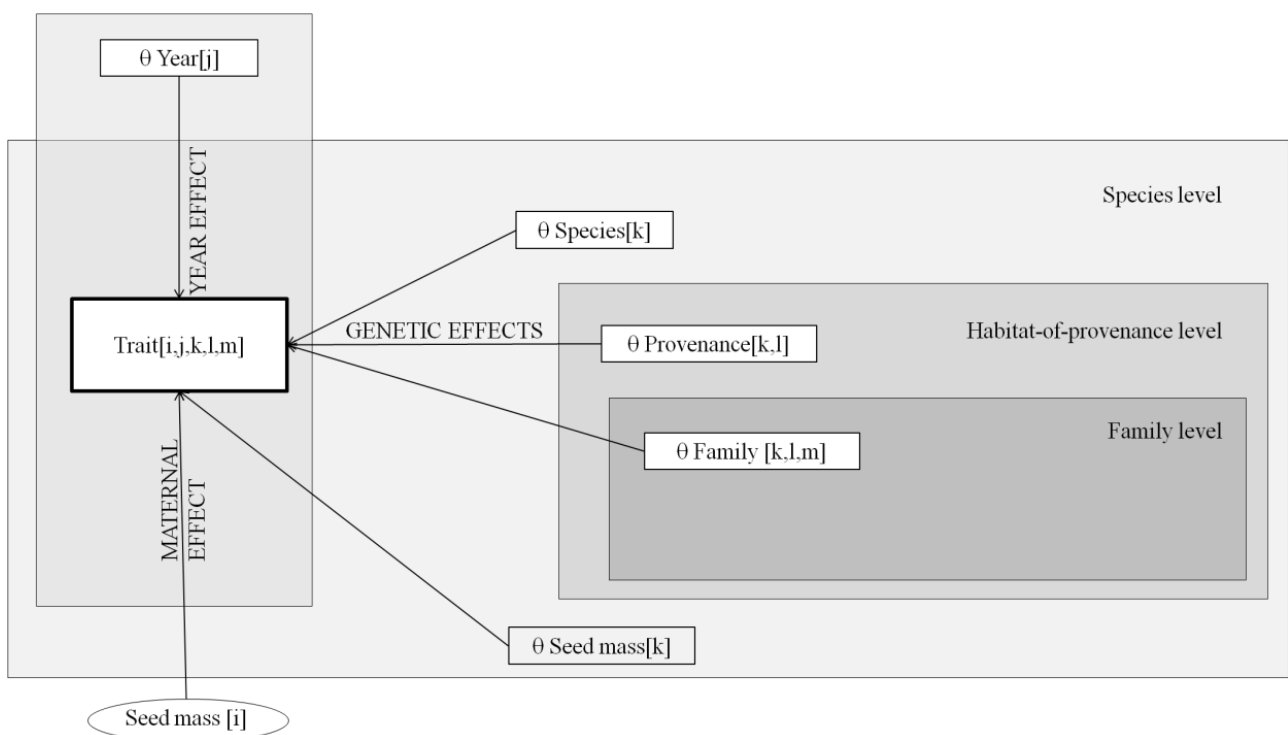

For all individuals,  $i$ :

$$Y_{ijklm} \sim N(\text{mean}_{ijklm}, \tau_{\text{res}})$$

$$\text{mean}_{ijklm} = \mu + \alpha_j + \beta_k + \gamma_{kl} + \tau_{klm} + (\varphi_k \times \text{Seed mass}_i)$$

$Y$  corresponds to the individual value for the phenotypic character.  $\tau_{\text{res}}$  corresponds to residual precision (1 / “within-groups” variance) of phenotypic variations. The term  $\alpha$  corresponds to the effect of the different years of seed sampling and culture,  $\beta$  corresponds to species effect,  $\gamma$  corresponds to provenance effect within each species (we allow each species to respond differently to soil provenance), and  $\tau$  corresponds to the effect of maternal family (in terms of mother tree identity) within each species and soil of provenance. Then, the term  $\varphi$  is the regression coefficient between trait value and seed mass. We also defined one parameter per species in order to allow for divergent effects of seed mass variation in the two species. This coefficient may be null, suggesting that intra-specific variations in seed mass does not affect phenotypic variations.

#### Prior definition:

All parameters were sorted using non-informative priors:

$$\tau_{\text{res}} \sim \text{Gamma}(0.0001, 0.0001)$$

$$\mu \sim N(0.00001, 0.00001)$$

$$\text{for all year } j : \alpha_j \sim N(0.00001, 0.00001)$$

$$\text{for all species } k : \beta_k \sim N(0.00001, 0.00001)$$

$$\text{for all provenance } l \text{ (within each species } k): \gamma_{kl} \sim N(0.00001, 0.00001)$$

$$\text{for all maternal families } m \text{ (within each provenance } l \text{ and species } k): \tau_{klm} \sim N(0.00001, 0.00001)$$

$$\text{for all species } k : \varphi_k \sim N(0.00001, 0.00001)$$

The model was made identifiable by defining constraint  $\sum \alpha_j = 0$  for each factor. The model was computed using 1 000 000 iterations with a burning of 100 000 and a thinning of 500. Parameters were estimates with 95% credible interval.

A parameter with 95% credible interval not overlapping 0 indicates that the phenotypic value of the group diverges to the phenotypic mean with a probability of 95%. Two groups identified by the same component (e.g. two habitats within the same species, for a given trait) are considered as different if their 95% credible intervals do not overlap.

### METHOD 3. Estimation of heritability ( $h^2$ ) with a Bayesian two-ways analysis of variance

Heritability was estimated at intra-specific level by estimation of ‘among-family’ exact precision.

For all individuals,

$$\text{Trait}_{ijm} \sim N(\text{mean}_{ijm}, \tau_{\text{res}})$$

$$\text{mean}_{ijm} = \mu + \alpha_j + \tau_m$$

For all years of sampling and culture,

$$\alpha_j \sim N(0, \tau_{\text{year}})$$

For all maternal families,

$$\tau_m \sim N(0, \tau_{\text{progeny}})$$

### Prior definition

$$\mu \sim N(0.00001, 0.00001)$$

$$\tau_{\text{res}} \sim \text{Gamma}(0.0001, 0.0001)$$

$$\tau_{\text{years}} \sim \text{Gamma}(0.0001, 0.0001)$$

$$\tau_{\text{progeny}} \sim \text{Gamma}(0.0001, 0.0001)$$

We computed  $\sigma_M^2 \sigma_P^2$  where  $\sigma_M^2$  is the genetic variance “among groups” (inverse of “among groups” precision  $\tau_M$ ),  $\sigma_P^2$  the total phenotypic variance (sum of the inverse of “among families” precision  $\tau_M$  plus the inverse of “among years” precision  $\tau_{\text{years}}$ , plus the inverse of residual precision  $\tau_{\text{res}}$ ).

The model was computed using 500 000 iterations with a burning of 2000 and a thinning from 20 to 50 depending on the different traits.

TABLE S1. Sampling size.  $N_{\text{progeny}}$  indicates the number of mother trees (maternal families) and  $n_{\text{seedlings}}$  the number of seedlings used in the analysis.

|                       | <b>Provenance</b> | $N_{\text{progeny}}$ | $n_{\text{seedlings}}$ (18 months) | $n_{\text{seedlings}}$ (24 months) |
|-----------------------|-------------------|----------------------|------------------------------------|------------------------------------|
| <i>E. falcata</i>     | Bottomland        | 10                   | 425                                | 180                                |
|                       | Slope             | 14                   | 538                                | 274                                |
|                       | Hilltop           | 10                   | 400                                | 202                                |
| <i>E. grandiflora</i> | Bottomland        | 2                    | 58                                 | 26                                 |
|                       | Slope             | 5                    | 155                                | 100                                |
|                       | Hilltop           | 3                    | 61                                 | 44                                 |
|                       | Total             | 44                   | 1637                               | 826                                |

TABLE S2. Sampling size for each mother tree and year of fructification.

|                       |            | Mother tree | 2006 | 2007 | 2008 |
|-----------------------|------------|-------------|------|------|------|
| <i>E. falcata</i>     | Bottomland | 1           | 0    | 7    | 0    |
|                       |            | 2           | 60   | 0    | 0    |
|                       |            | 3           | 0    | 20   | 48   |
|                       |            | 4           | 0    | 12   | 0    |
|                       |            | 5           | 0    | 12   | 0    |
|                       |            | 6           | 40   | 0    | 28   |
|                       |            | 7           | 47   | 0    | 0    |
|                       |            | 8           | 0    | 12   | 48   |
|                       |            | 9           | 0    | 12   | 0    |
|                       |            | 10          | 0    | 52   | 27   |
|                       | Slope      | 11          | 0    | 16   | 0    |
|                       |            | 12          | 18   | 0    | 0    |
|                       |            | 13          | 21   | 0    | 0    |
|                       |            | 14          | 5    | 0    | 0    |
|                       |            | 15          | 0    | 17   | 0    |
|                       |            | 16          | 0    | 7    | 0    |
|                       |            | 17          | 18   | 8    | 48   |
|                       |            | 18          | 57   | 0    | 0    |
|                       |            | 19          | 0    | 52   | 0    |
|                       |            | 20          | 45   | 0    | 24   |
|                       |            | 21          | 12   | 0    | 0    |
|                       |            | 22          | 0    | 20   | 31   |
|                       |            | 23          | 0    | 30   | 38   |
|                       |            | 24          | 0    | 51   | 20   |
|                       | Hilltop    | 25          | 0    | 0    | 44   |
|                       |            | 26          | 20   | 0    | 0    |
|                       |            | 27          | 53   | 0    | 0    |
|                       |            | 28          | 59   | 0    | 0    |
|                       |            | 29          | 0    | 12   | 0    |
|                       |            | 30          | 0    | 12   | 48   |
|                       |            | 31          | 0    | 48   | 23   |
|                       |            | 32          | 0    | 36   | 0    |
|                       |            | 33          | 0    | 7    | 0    |
|                       |            | 34          | 0    | 38   | 0    |
| <i>E. grandiflora</i> | Bottomland | 35          | 0    | 6    | 0    |
|                       |            | 36          | 0    | 0    | 52   |
|                       | Slope      | 37          | 0    | 0    | 20   |
|                       |            | 38          | 0    | 0    | 64   |
|                       |            | 39          | 0    | 8    | 20   |
|                       |            | 40          | 0    | 12   | 0    |
|                       |            | 41          | 0    | 31   | 0    |
|                       | Hilltop    | 42          | 0    | 0    | 38   |
|                       |            | 43          | 0    | 0    | 15   |
|                       |            | 44          | 0    | 8    | 0    |

TABLE S3. Parameters estimated by the Bayesian analysis of phenotypic value decomposition for seedlings biomass and energy allocation.

|                              |                                                |              | Total Mass 24 |          | Root Mass 24 |         | Leaf mass 24 |        | Leaf surface 24 |           | LMR 24      |           | RMR 24      |             | LAR 24   |           |           |         |        |       |   |
|------------------------------|------------------------------------------------|--------------|---------------|----------|--------------|---------|--------------|--------|-----------------|-----------|-------------|-----------|-------------|-------------|----------|-----------|-----------|---------|--------|-------|---|
|                              |                                                |              | 2.5           | 97.5     | 2.5          | 97.5    | 2.5          | 97.5   | 2.5             | 97.5      | 2.5         | 97.5      | 2.5         | 97.5        | 2.5      | 97.5      |           |         |        |       |   |
| Year effect                  | Ø2006<br>Ø2007<br>Ø2008                        |              | -13.940       | 7.777    | -4.217       | 2.758   | -3.954       | 1.178  | -565.5          | 45.7      | -3.42E-02   | 1.99E-03  | 8.31E-03    | 5.37E-02    | *        | -8.6      | -1.431    | *       |        |       |   |
|                              |                                                |              | 0.535         | 16.230   | * -0.780     | 4.262   | 1.181        | 4.891  | *               | 237.8     | 684.4       | *         | 2.93E-03    | 2.79E-02    | *        | -4.99E-02 | -1.71E-02 | *       | 0.3759 | 5.314 | * |
|                              |                                                |              | -12.930       | 1.274    | -3.461       | 1.101   | -3.450       | -0.094 | *               | -439.5    | 7.8         | -1.15E-02 | 1.12E-02    | -1.34E-02   | 1.62E-02 |           | -0.2466   | 4.232   |        |       |   |
| Species effect               | Ø <i>E. grandiflora</i><br>Ø <i>E. falcata</i> |              | -7.664        | 19.560   | -3.691       | 5.052   | -1.657       | 4.775  | -506.0          | 395.3     | -5.26E-02   | -1.02E-02 | *           | -4.48E-02   | 1.21E-02 |           | -17.36    | -8.969  | *      |       |   |
|                              |                                                |              | -19.560       | 7.664    | -5.052       | 3.691   | -4.775       | 1.657  | -395.3          | 506.0     | 1.02E-02    | 5.26E-02  | *           | -1.21E-02   | 4.48E-02 |           | 8.969     | 17.36   | *      |       |   |
| Habitat-of-provenance effect | <i>E. falcata</i>                              | Ø Hilltop    | -5.135        | 3.778    | -1.903       | 0.959   | -0.954       | 1.152  | -157.6          | 150.1     | 1.77E-03    | 1.63E-02  | *           | -1.46E-02   | 4.05E-03 |           | -0.009    | 2.873   |        |       |   |
|                              |                                                | Ø Slope      | -14.960       | -5.466   | * -5.105     | -2.056  | * -3.105     | -0.862 | * -433.3        | -120.1    | * -2.42E-03 | 1.29E-02  |             | -7.55E-03   | 1.23E-02 |           | 0.062     | 3.091   | *      |       |   |
|                              |                                                | Ø Bottomland | 5.875         | 16.050   | * 2.441      | 5.708   | * 0.699      | 3.102  | * 115.5         | 456.2     | * -2.19E-02 | -6.03E-03 | *           | -7.58E-03   | 1.37E-02 |           | -4.541    | -1.39   | *      |       |   |
|                              | <i>E. grandiflora</i>                          | Ø Hilltop    | -22.290       | -2.797   | * -6.738     | -0.478  | * -4.740     | -0.134 | * -582.6        | 73.5      | * -8.34E-03 | 2.25E-02  |             | -9.55E-03   | 3.12E-02 |           | -2.444    | 3.661   |        |       |   |
|                              |                                                | Ø Slope      | -18.470       | -0.314   | * -5.457     | 0.372   | * -4.572     | -0.284 | * -566.8        | 49.1      | * -1.56E-02 | 1.35E-02  |             | -1.11E-02   | 2.68E-02 |           | -2.411    | 3.355   |        |       |   |
|                              |                                                | Ø Bottomland | 10.250        | 34.460   | * 2.399      | 10.170  | * 2.105      | 7.824  | * 121.5         | 934.1     | * -2.48E-02 | 1.36E-02  |             | -4.30E-02   | 7.51E-03 |           | -4.796    | 2.811   |        |       |   |
| Family effect                | <i>E. falcata</i>                              | Bottomland   | Ø family1     | -38.350  | 17.510       | -12.780 | 5.160        | -9.605 | 3.590           | -1511.0   | 386.7       | -5.28E-02 | 3.55E-02    | -4.83E-02   | 6.83E-02 |           | -9.879    | 7.558   |        |       |   |
|                              |                                                |              | Ø family2     | -4.839   | 35.990       | 0.753   | 13.870       | -1.472 | 8.176           | -261.2    | 985.2       | -4.17E-02 | 2.34E-02    | -4.58E-02   | 3.95E-02 |           | -9.065    | 3.808   |        |       |   |
|                              |                                                |              | Ø family3     | -7.429   | 22.880       | -1.224  | 8.510        | -1.705 | 5.456           | -155.6    | 826.4       | -2.08E-02 | 2.73E-02    | -2.61E-02   | 3.72E-02 |           | -3.847    | 5.516   |        |       |   |
|                              |                                                |              | Ø family4     | -34.690  | 9.084        | -10.700 | 3.359        | -7.777 | 2.566           | -1006.0   | 393.9       | -3.24E-02 | 3.63E-02    | -2.28E-02   | 6.86E-02 |           | -7.793    | 5.793   |        |       |   |
|                              |                                                |              | Ø family5     | -17.590  | 26.040       | -7.576  | 6.436        | -2.623 | 7.685           | -142.8    | 1235.0      | -9.12E-03 | 5.95E-02    | -7.23E-02   | 1.88E-02 |           | -0.8136   | 12.83   |        |       |   |
|                              |                                                |              | Ø family6     | 6.826    | 45.020       | * 2.779 | 15.040       | -0.926 | 8.097           | -199.3    | 1040.0      | -5.30E-02 | 8.22E-03    | -6.12E-02   | 1.85E-02 |           | -11.26    | 1.031   |        |       |   |
|                              |                                                |              | Ø family7     | -35.540  | 5.248        | -10.890 | 2.210        | -8.635 | 1.003           | -1196.0   | 56.4        | -3.82E-02 | 2.67E-02    | -2.28E-02   | 6.24E-02 |           | -5.888    | 7.022   |        |       |   |
|                              |                                                |              | Ø family8     | -14.180  | 21.390       | -5.647  | 5.775        | -2.162 | 6.241           | -292.8    | 875.6       | 1.58E-03  | 5.73E-02    | * -5.25E-02 | 2.18E-02 |           | 0.6784    | 11.74   | *      |       |   |
|                              |                                                |              | Ø family9     | -34.340  | 5.225        | -11.640 | 1.070        | -8.611 | 0.735           | -1198.0   | 76.2        | -5.76E-02 | 5.11E-03    | -4.03E-02   | 4.23E-02 |           | -12.38    | 0.04394 |        |       |   |
|                              |                                                |              | Ø family10    | -19.950  | 8.228        | -7.338  | 1.710        | -3.755 | 2.901           | -452.1    | 472.5       | -1.22E-02 | 3.26E-02    | -2.56E-02   | 3.32E-02 |           | -2.446    | 6.454   |        |       |   |
|                              | Slope                                          | Ø family11   | -16.310       | 19.640   | -6.699       | 4.847   | -2.425       | 6.070  | -194.4          | 1013.0    | 2.89E-03    | 6.19E-02  | * -7.40E-02 | 1.06E-03    |          | 0.551     | 12.25     | *       |        |       |   |
|                              |                                                | Ø family12   | -5.335        | 32.090   | -3.188       | 8.833   | -0.472       | 8.372  | 47.3            | 1211.0    | * -1.31E-02 | 4.67E-02  | -1.10E-01   | -3.18E-02   |          | -0.7922   | 11.01     |         |        |       |   |
|                              |                                                | Ø family13   | -41.700       | -3.289   | -12.480      | -0.141  | -9.959       | -0.884 | * -1417.0       | -205.2    | * -3.56E-02 | 2.48E-02  | 1.75E-02    | 9.77E-02    | *        | -6.986    | 4.978     |         |        |       |   |
|                              |                                                | Ø family14   | 3.345         | 66.880   | * -2.122     | 18.280  | 0.237        | 15.250 | * -159.2        | 1728.0    | -5.83E-02   | 4.19E-02  | -1.59E-01   | -2.60E-02   | *        | -12.26    | 7.578     |         |        |       |   |
|                              |                                                | Ø family15   | -27.140       | 8.606    | -8.492       | 2.985   | -6.137       | 2.985  | -719.0          | 395.2     | -2.38E-02   | 3.37E-02  | -2.37E-02   | 5.09E-02    |          | -4.246    | 7.132     |         |        |       |   |
|                              |                                                | Ø family16   | -39.240       | 13.410   | -10.700      | 6.211   | -9.296       | 3.144  | -1226.0         | 354.0     | -3.97E-02   | 4.25E-02  | -1.47E-02   | 9.52E-02    |          | -11.79    | 4.425     |         |        |       |   |
|                              |                                                | Ø family17   | -24.790       | 0.818    | -8.094       | 0.130   | -4.948       | 1.102  | -637.0          | 217.7     | 1.60E-02    | 5.74E-02  | * -3.95E-02 | 1.40E-02    |          | 4.147     | 12.33     | *       |        |       |   |
|                              |                                                | Ø family18   | -15.400       | 22.720   | -4.322       | 7.918   | -3.780       | 5.224  | -512.9          | 664.3     | -4.42E-02   | 1.61E-02  | -3.33E-02   | 4.63E-02    |          | -7.536    | 4.404     |         |        |       |   |
|                              |                                                | Ø family19   | 5.329         | 42.700   | 1.399        | 13.400  | 1.290        | 10.120 | 207.7           | 1369.0    | * -2.69E-02 | 3.23E-02  | -6.02E-02   | 1.78E-02    |          | -5.508    | 6.196     |         |        |       |   |
|                              |                                                | Ø family20   | -21.090       | 8.386    | -5.667       | 3.799   | -4.995       | 1.969  | -772.9          | 180.4     | -2.86E-02   | 1.83E-02  | 1.02E-02    | 1.71E-02    | *        | -8.155    | 1.136     |         |        |       |   |
|                              |                                                | Ø family21   | -15.320       | 28.520   | -5.544       | 8.534   | -4.155       | 6.203  | -507.9          | 853.4     | -5.95E-02   | 1.04E-02  | -6.23E-02   | 2.92E-02    |          | -9.528    | 4.307     |         |        |       |   |
|                              |                                                | Ø family22   | -10.210       | 24.650   | -3.139       | 8.054   | -3.665       | 4.569  | -553.3          | 547.7     | -5.95E-02   | -4.97E-03 | * -1.65E-02 | 5.63E-02    |          | -13.12    | -2.224    |         |        |       |   |
|                              |                                                | Ø family23   | -19.200       | 10.970   | -5.802       | 3.887   | -4.297       | 2.831  | -489.5          | 475.3     | -2.14E-02   | 2.71E-02  | -1.72E-02   | 4.58E-02    |          | -3.819    | 5.81      |         |        |       |   |
|                              |                                                | Ø family24   | -40.430       | -7.125   | -11.050      | -0.360  | -10.590      | -2.727 | * -1407.0       | -337.5    | * -3.35E-02 | 1.92E-02  | 2.39E-02    | 9.34E-02    | *        | -5.145    | 5.312     |         |        |       |   |
|                              | Hilltop                                        | Ø family25   | 4.287         | 36.630   | * 2.910      | 13.300  | 0.106        | 7.747  | * 19.5          | 1141.0    | * -4.42E-02 | 8.64E-03  | -1.93E-02   | 4.83E-02    |          | -9.452    | 1.043     |         |        |       |   |
|                              |                                                | Ø family26   | -28.390       | 12.240   | -8.654       | 4.395   | -7.567       | 2.033  | -935.0          | 270.4     | -3.33E-02   | 3.10E-02  | -3.02E-02   | 5.47E-02    |          | -3.532    | 9.192     |         |        |       |   |
|                              |                                                | Ø family27   | 1.480         | 38.770   | * -0.312     | 11.660  | -0.500       | 8.311  | -115.9          | 1006.0    | -3.50E-02   | 2.43E-02  | -8.84E-02   | -1.05E-02   | *        | -8.104    | 3.622     |         |        |       |   |
|                              |                                                | Ø family28   | -29.780       | 5.146    | -10.470      | 0.751   | -7.164       | 1.089  | -927.5          | 138.5     | -1.66E-02   | 4.01E-02  | -6.10E-02   | 1.19E-02    |          | -3.167    | 8.172     |         |        |       |   |
|                              |                                                | Ø family29   | -22.760       | 20.770   | -6.822       | 7.156   | -6.044       | 4.240  | -847.0          | 535.5     | -6.67E-02   | 1.94E-03  | -2.51E-02   | 6.58E-02    |          | -15.06    | -1.498    | *       |        |       |   |
|                              |                                                | Ø family30   | -41.460       | -5.305   | * -12.390    | -0.782  | -9.182       | -0.640 | * -1284.0       | -114.5    | * -1.11E-02 | 4.59E-02  | -1.51E-02   | 6.04E-02    |          | -3.711    | 7.53      |         |        |       |   |
|                              |                                                | Ø family31   | -10.910       | 15.630   | -3.770       | 4.749   | -2.541       | 3.726  | -317.6          | 561.4     | -2.72E-02   | 1.56E-02  | -2.42E-02   | 3.12E-02    |          | -5.362    | 3.103     |         |        |       |   |
|                              |                                                | Ø family32   | -12.830       | 19.470   | -3.555       | 6.818   | -3.053       | 4.579  | -374.8          | 664.4     | -2.78E-02   | 2.37E-02  | -2.75E-02   | 3.99E-02    |          | -5.686    | 4.517     |         |        |       |   |
|                              |                                                | Ø family33   | -7.745        | 43.840   | -5.821       | 10.740  | 0.949        | 13.140 | * 32.1          | 1622.0    | * -2.62E-02 | 5.64E-02  | -8.18E-02   | 2.59E-02    |          | -8.532    | 7.741     |         |        |       |   |
|                              |                                                | Ø family34   | -35.510       | -2.513   | * -10.080    | 0.516   | -8.386       | -0.590 | * -1071.0       | -9.3      | * -5.20E-03 | 4.76E-02  | -1.09E-02   | 5.80E-02    |          | 4.548     | 15.06     | *       |        |       |   |
| <i>E. grandiflora</i>        | Bottom.                                        | Ø family35   | -7.715        | 25.830   | -3.008       | 7.763   | -1.107       | 6.817  | -258.0          | 840.4     | -2.52E-02   | 2.85E-02  | -3.10E-02   | 3.90E-02    |          | -4.164    | 6.417     |         |        |       |   |
|                              |                                                | Ø family36   | -25.830       | 7.715    | -7.763       | 3.008   | -6.817       | 1.107  | -840.4          | 258.0     | -2.85E-02   | 2.52E-02  | -3.90E-02   | 3.10E-02    |          | -6.417    | 4.164     |         |        |       |   |
|                              | Slope                                          | Ø family37   | 10.170        | 40.550   | * 4.184      | 13.940  | 0.149        | 7.325  | * -71.6         | 990.3     | -3.79E-02   | 9.80E-03  | -4.19E-02   | 2.16E-02    |          | -7.008    | 2.554     |         |        |       |   |
|                              |                                                | Ø family38   | -21.950       | 8.828    | -8.057       | 1.826   | -5.370       | 1.901  | -692.5          | 318.1     | -2.91E-02   | 1.97E-02  | -5.01E-02   | 1.42E-02    |          | -6.073    | 3.537     |         |        |       |   |
|                              |                                                | Ø family39   | 6.805         | 32.490   | * -0.449     | 7.800   | 4.541        | 10.610 | * 469.7         | 1336.0    | * 1.47E-02  | 5.55E-02  | * -6.96E-02 | -1.60E-02   | *        | 0.6324    | 8.725     | *       |        |       |   |
|                              |                                                | Ø family40   | -39.310       | -2.809   | * -11.070    | 0.653   | -10.720      | -2.101 | * -1360.0       | -189.4    | * -5.61E-02 | 1.03E-03  | -1.77E-03   | 7.44E-02    |          | -8.974    | 2.335     |         |        |       |   |
|                              | Ø family41                                     | -32.050      | -2.268        | * -9.121 | 0.443        | -6.629  | 0.407        | -891.2 | 101.3           | -1.16E-02 | 3.72E-02    | 3.95E-03  | 6.61E-02    | *           | -2.349   | 7.309     |           |         |        |       |   |
|                              | Hilltop                                        | Ø family42   | -22.560       | 6.963    | -7.263       | 2.219   | -5.159       | 1.816  | -665.6          | 333.1     | -2.35E-02   | 2.31E-02  | -2.30E-02   | 3.86E-02    |          | -4.552    | 4.648     |         |        |       |   |
| Ø family43                   |                                                | -16.430      | 15.450        | -5.713   | 4.525        | -4.195  | 3.337        | -509.8 | 535.6           | -3.05E-02 | 1.94E-02    | -5.05E-02 | 1.61E-02    |             | -5.805   | 4.071     |           |         |        |       |   |
| Ø family44                   | -11.850                                        | 28.400       | -3.351        | 9.575    | -2.657       | 6.852   | -488.6       | 800.5  | -2.60E-02       | 3.74E-02  | -3.26E-02   | 5.14E-02  |             | -5.467      | 7.094    |           |           |         |        |       |   |
| Seed mass                    | <i>E. falcata</i>                              | Ø Seed mass  | 4.151         | 6.956    | * 1.444      | 2.345   | 0.806        | 1.469  | * 107.8         | 204.1     | * -9.61E-03 | -5.20E-03 | * -4.02E-03 | 1.84E-03    |          | -2.322    | -1.446    | *       |        |       |   |
|                              | <i>E. grandiflora</i>                          | Ø Seed mass  | 0.467         | 1.105    | * 0.200      | 0.405   | 0.071        | 0.222  | * 7.9           | 29.3      | * -9.11E-04 | 9.70E-05  | -4.38E-04   | 8.94E-04    |          | -0.1614   | 0.03814   |         |        |       |   |

TABLE S4. Parameters estimated by the Bayesian analysis of phenotypic value decomposition for seedlings height and growth rate.

|                              |                         | Height 6     |         | Height 12 |           | Height 18 |           | Height 24 |           | Growth rate 6-12 |          | Growth rate 12-18 |          | Growth rate 18-24 |          |        |       |
|------------------------------|-------------------------|--------------|---------|-----------|-----------|-----------|-----------|-----------|-----------|------------------|----------|-------------------|----------|-------------------|----------|--------|-------|
|                              |                         | 2.5          | 97.5    | 2.5       | 97.5      | 2.5       | 97.5      | 2.5       | 97.5      | 2.5              | 97.5     | 2.5               | 97.5     | 2.5               | 97.5     |        |       |
|                              |                         | Year effect  | Ø2006   | -3.942    | 0.095     | -4.525    | 3.804     | -10.540   | 2.833     | -23.680          | 3.692    | -0.260            | 0.754    | -1.265            | 0.030    | -1.099 | 1.093 |
|                              | Ø2007                   | 5.103        | 8.100   | 3.015     | 9.476     | * 1.934   | 12.320    | * 3.304   | 23.490    | * -0.383         | 0.365    | -0.307            | 0.695    | -0.011            | 1.539    |        |       |
|                              | Ø2008                   | -5.758       | -3.498  | -8.405    | -3.715    | * -7.301  | 0.256     | -12.370   | 5.044     | -0.536           | 0.040    | 0.059             | 0.777    | * -1.482          | -0.093   | *      |       |
| Species effect               | Ø <i>E. grandiflora</i> | 5.864        | 10.940  | * 7.423   | 18.270    | * 0.543   | 17.990    | * -6.199  | 26.960    | -0.080           | 1.226    | -1.648            | 0.189    | -0.842            | 1.774    |        |       |
|                              | Ø <i>E. falcata</i>     | -10.940      | -5.864  | * -18.270 | -7.423    | * -17.990 | -0.543    | * -26.910 | 6.264     | -1.226           | 0.080    | -0.189            | 1.648    | -1.774            | 0.842    |        |       |
| Habitat-of-provenance effect | <i>E. falcata</i>       | Ø Hilltop    | -1.001  | 1.034     | -2.905    | 1.538     | -4.820    | 2.296     | -6.542    | 5.060            | -0.364   | 0.165             | -0.434   | 0.255             | -0.398   | 0.510  |       |
|                              |                         | Ø Slope      | -2.690  | -0.477    | * -5.922  | -1.251    | * -9.481  | -2.042    | * -13.460 | -1.726           | * -0.615 | -0.064            | * -0.682 | -0.009            | * -0.679 | 0.258  |       |
|                              |                         | Ø Bottomland | 0.450   | 2.669     | * 1.760   | 6.486     | * 3.100   | 10.540    | * 2.523   | 14.620           | * 0.153  | 0.729             | * 0.058  | 0.785             | * -0.312 | 0.664  |       |
|                              | <i>E. grandiflora</i>   | Ø Hilltop    | -3.770  | 1.283     | -6.915    | 3.098     | -15.050   | 1.081     | -24.790   | 0.109            | -0.588   | 0.694             | -1.588   | 0.039             | -1.315   | 0.569  |       |
|                              |                         | Ø Slope      | -4.768  | -0.666    | * -10.870 | -2.058    | * -11.680 | 2.511     | -18.230   | 4.591            | -1.185   | -0.111            | * -0.361 | 1.043             | -0.829   | 0.946  |       |
|                              |                         | Ø Bottomland | 1.055   | 6.746     | * 1.957   | 14.470    | * 1.243   | 21.400    | * 4.966   | 34.660           | * -0.179 | 1.316             | -0.513   | 1.430             | -0.814   | 1.500  |       |
| Family effect                | Bottomland              | Ø family1    | -9.256  | 3.962     | -20.040   | 9.548     | -35.700   | 7.991     | -60.250   | 4.126            | -2.264   | 1.413             | -3.221   | 1.101             | -4.286   | 0.720  |       |
|                              |                         | Ø family2    | -1.734  | 5.262     | -8.108    | 6.836     | -10.270   | 13.600    | -12.660   | 36.330           | -1.318   | 0.579             | -0.858   | 1.570             | -2.192   | 1.918  |       |
|                              |                         | Ø family3    | -3.683  | 1.853     | -9.931    | 1.856     | -16.660   | 2.096     | -13.340   | 23.850           | -1.235   | 0.143             | -1.535   | 0.361             | -0.324   | 2.602  |       |
|                              |                         | Ø family4    | -6.358  | 3.695     | -12.350   | 9.544     | -17.900   | 17.510    | -34.180   | 18.460           | -1.400   | 1.404             | -1.626   | 1.727             | -1.540   | 2.642  |       |
|                              |                         | Ø family5    | -2.460  | 9.201     | -8.551    | 16.910    | -13.760   | 26.530    | -15.100   | 40.200           | -1.276   | 1.590             | -1.628   | 2.022             | -1.021   | 3.193  |       |
|                              |                         | Ø family6    | -1.201  | 4.767     | 4.191     | 16.820    | * 10.640  | 30.750    | * -0.157  | 47.490           | 0.734    | 2.224             | * 0.691  | 2.676             | * -1.503 | 2.382  |       |
|                              |                         | Ø family7    | -6.828  | 0.476     | -14.030   | 1.405     | -22.200   | 2.585     | -44.100   | 6.636            | -1.375   | 0.481             | -1.853   | 0.617             | -4.034   | -0.046 | *     |
|                              |                         | Ø family8    | -5.045  | 0.319     | -13.040   | -0.713    | * -15.210 | 4.520     | -21.010   | 20.120           | -1.383   | 0.051             | -0.737   | 1.140             | -1.414   | 2.011  |       |
|                              |                         | Ø family9    | -0.950  | 8.843     | -4.250    | 17.810    | -15.640   | 19.970    | -24.470   | 26.940           | -0.850   | 1.764             | -2.589   | 0.759             | -1.407   | 2.395  |       |
|                              |                         | Ø family10   | -2.896  | 1.813     | -4.232    | 5.720     | -4.981    | 11.300    | -17.840   | 17.010           | -0.379   | 0.903             | -0.427   | 1.115             | -1.602   | 1.154  |       |
|                              | Slope                   | Ø family11   | -2.543  | 6.638     | -5.979    | 14.810    | -8.277    | 25.060    | -12.680   | 34.780           | -0.849   | 1.603             | -1.097   | 2.050             | -1.044   | 2.534  |       |
|                              |                         | Ø family12   | -0.446  | 9.190     | -1.231    | 18.890    | -1.130    | 31.730    | -1.162    | 46.040           | -0.473   | 1.975             | -0.586   | 2.558             | -1.360   | 2.350  |       |
|                              |                         | Ø family13   | -6.907  | 1.647     | -22.190   | -4.572    | * -38.480 | -9.816    | * -49.480 | -2.737           | -2.931   | -0.687            | * -3.251 | -0.516            | * -4.051 | -0.272 | *     |
|                              |                         | Ø family14   | -2.919  | 12.890    | -1.944    | 32.010    | -4.792    | 48.990    | 9.442     | 89.270           | * -0.400 | 3.785             | -1.523   | 3.571             | 0.041    | 6.182  |       |
|                              |                         | Ø family15   | -7.567  | 1.706     | -18.190   | 1.337     | -30.080   | 1.382     | -39.230   | 5.802            | -2.107   | 0.293             | -2.707   | 0.191             | -2.054   | 1.412  |       |
|                              |                         | Ø family16   | -11.690 | 2.666     | -20.950   | 9.796     | -31.460   | 14.580    | -51.940   | 14.890           | -2.033   | 1.705             | -1.387   | 3.267             | -4.395   | 0.630  |       |
|                              |                         | Ø family17   | -6.710  | -1.675    | * -9.611  | 0.953     | -16.420   | 0.530     | -24.890   | 7.599            | -0.599   | 0.711             | -1.476   | 0.183             | -1.809   | 0.715  |       |
|                              |                         | Ø family18   | -3.098  | 3.199     | -4.705    | 9.422     | -2.057    | 20.670    | -22.210   | 23.800           | -0.439   | 1.165             | -0.012   | 2.204             | -1.940   | 1.875  |       |
|                              |                         | Ø family19   | -2.880  | 3.507     | -4.670    | 8.480     | -9.068    | 12.110    | -4.543    | 40.030           | -0.543   | 1.080             | -1.468   | 0.671             | 0.407    | 4.007  | *     |
|                              |                         | Ø family20   | -0.608  | 4.919     | -7.752    | 4.212     | -11.820   | 7.493     | -32.010   | 5.196            | -1.337   | 0.130             | -1.126   | 0.804             | -2.541   | 0.383  |       |
|                              |                         | Ø family21   | -0.366  | 9.788     | -6.019    | 16.270    | -14.670   | 20.730    | -18.590   | 41.010           | -1.305   | 1.417             | -2.093   | 1.371             | -2.281   | 1.951  |       |
|                              |                         | Ø family22   | -1.555  | 4.455     | 7.728     | 20.190    | * 10.520  | 30.460    | * -17.990 | 24.060           | 0.954    | 2.543             | * 0.172  | 2.081             | * -2.023 | 1.337  |       |
|                              |                         | Ø family23   | -5.306  | 0.056     | -13.520   | -1.050    | * -16.440 | 3.446     | -17.080   | 21.290           | -1.478   | -0.120            | * -0.874 | 0.929             | -0.309   | 2.653  |       |
|                              |                         | Ø family24   | -5.834  | -0.427    | * -15.740 | -3.640    | * -24.280 | -4.837    | * -51.450 | -12.120          | * -1.709 | -0.302            | * -1.843 | 0.115             | -2.691   | 0.488  |       |
|                              | Hilltop                 | Ø family25   | 1.429   | 7.117     | * 1.642   | 14.240    | * 3.925   | 24.130    | * -1.935  | 41.500           | -0.100   | 1.511             | 0.040    | 1.974             | * 0.237  | 3.490  | *     |
|                              |                         | Ø family26   | -6.126  | 3.802     | -13.470   | 8.076     | -19.020   | 15.620    | -27.530   | 22.680           | -1.445   | 1.126             | -1.534   | 1.719             | -2.705   | 1.472  |       |
|                              |                         | Ø family27   | 1.494   | 8.241     | * 5.147   | 19.790    | * 7.397   | 30.930    | * -3.424  | 42.850           | 0.421    | 2.210             | * -0.152 | 2.120             | -2.470   | 1.255  |       |
|                              |                         | Ø family28   | -5.262  | 1.537     | -10.960   | 3.536     | -16.220   | 7.037     | -30.020   | 14.890           | -1.123   | 0.560             | -1.307   | 0.891             | -3.026   | 0.612  |       |
|                              |                         | Ø family29   | -3.143  | 7.457     | -10.050   | 12.880    | -20.690   | 15.120    | -32.160   | 18.050           | -1.492   | 1.239             | -2.076   | 1.365             | -2.504   | 1.512  |       |
|                              |                         | Ø family30   | -9.722  | -4.582    | * -21.420 | -10.470   | * -30.770 | -13.330   | * -53.750 | -11.740          | * -2.278 | -0.852            | * -1.872 | -0.236            | * -3.169 | 0.279  |       |
|                              |                         | Ø family31   | -4.197  | 0.935     | -9.022    | 2.189     | -15.130   | 2.695     | -15.230   | 18.520           | -0.980   | 0.320             | -1.351   | 0.305             | -0.617   | 2.015  |       |
|                              |                         | Ø family32   | -3.137  | 3.530     | -6.420    | 8.061     | -13.010   | 10.100    | -15.850   | 25.450           | -0.748   | 0.980             | -1.323   | 0.797             | 0.049    | 3.183  | *     |
|                              |                         | Ø family33   | -0.429  | 12.040    | 1.066     | 27.830    | * 0.767   | 43.840    | * -10.970 | 53.810           | -0.320   | 3.107             | -0.685   | 3.294             | -2.527   | 2.453  |       |
|                              |                         | Ø family34   | -8.750  | -1.922    | * -18.370 | -4.484    | * -27.520 | -5.289    | * -35.320 | 5.055            | -1.878   | -0.225            | * -1.852 | 0.238             | -1.268   | 1.961  |       |
| <i>E. grandiflora</i>        | Bottom.                 | Ø family35   | -6.774  | 1.270     | -8.744    | 9.266     | -8.683    | 20.310    | -20.390   | 23.200           | -0.363   | 1.712             | -0.534   | 2.265             | -1.250   | 2.002  |       |
|                              |                         | Ø family36   | -1.270  | 6.774     | -9.266    | 8.744     | -20.310   | 8.683     | -23.060   | 20.770           | -1.712   | 0.363             | -2.265   | 0.534             | -2.002   | 1.250  |       |
|                              | Slope                   | Ø family37   | 11.250  | 19.140    | * 11.960  | 28.360    | * 12.540  | 38.990    | * 9.096   | 46.720           | * -0.080 | 1.934             | -0.230   | 2.189             | -1.155   | 1.764  |       |
|                              |                         | Ø family38   | -3.346  | 2.369     | -4.716    | 7.771     | -10.670   | 9.360     | -20.240   | 16.290           | -0.457   | 0.966             | -1.334   | 0.643             | -1.456   | 1.452  |       |
|                              |                         | Ø family39   | 0.414   | 6.741     | * 0.769   | 15.250    | * 8.626   | 31.950    | * 15.070  | 48.120           | * -0.095 | 1.618             | 0.953    | 3.215             | * 0.690  | 3.213  | *     |
|                              |                         | Ø family40   | -13.220 | -4.036    | * -23.600 | -3.786    | * -39.580 | -7.714    | * -56.490 | -10.540          | * -2.041 | 0.226             | -3.172   | -0.160            | * -3.673 | -0.204 | *     |
|                              | Ø family41              | -13.040      | -6.562  | * -22.460 | -8.805    | * -32.160 | -10.230   | * -42.010 | -3.242    | * -1.955         | -0.232   | * -2.078          | 0.189    | -1.674            | 1.291    |        |       |
|                              | Hilltop                 | Ø family42   | 1.242   | 7.865     | * -9.307  | 4.845     | -12.600   | 10.200    | -24.700   | 11.790           | -2.109   | -0.311            | * -0.912 | 1.257             | -1.792   | 1.025  |       |
| Ø family43                   |                         | 1.060        | 9.097   | * 0.219   | 17.390    | * -6.963  | 20.670    | -19.130   | 20.530    | -0.206           | 1.881    | -1.550            | 1.032    | -2.603            | 0.444    |        |       |
| Ø family44                   |                         | -14.360      | -4.830  | * -16.840 | 4.086     | -21.990   | 11.520    | -18.240   | 30.870    | -0.959           | 1.628    | -1.354            | 1.648    | -0.446            | 3.425    |        |       |
| Seed mass                    | <i>E. falcata</i>       | Ø Seed mass  | 2.482   | 2.970     | * 3.753   | 4.801     | * 4.475   | 6.155     | * 3.410   | 6.779            | * 0.194  | 0.323             | * 0.073  | 0.234             | * -0.099 | 0.172  |       |
|                              | <i>E. grandiflora</i>   | Ø Seed mass  | 0.232   | 0.350     | * 0.314   | 0.567     | * 0.349   | 0.757     | * 0.060   | 0.875            | * 0.014  | 0.045             | * -0.002 | 0.039             | -0.051   | 0.010  |       |

TABLE S5. Parameters estimated by the Bayesian analysis of phenotypic value decomposition for seedlings diameter and radial growth.

|                              |                       |                         | Diameter 18 |        | Diameter 24 |        | Radial growth 18-24 |        |        |        |        |   |
|------------------------------|-----------------------|-------------------------|-------------|--------|-------------|--------|---------------------|--------|--------|--------|--------|---|
|                              |                       |                         | 2.5         | 97.5   | 2.5         | 97.5   | 2.5                 | 97.5   |        |        |        |   |
| Year effect                  |                       | Θ2006                   | 0.248       | 1.050  | *           | -1.013 | 0.803               | -0.165 | -0.005 | *      |        |   |
|                              |                       | Θ2007                   | -0.127      | 0.489  |             | 0.251  | 1.569               | *      | 0.031  | 0.150  | *      |   |
|                              |                       | Θ2008                   | -1.074      | -0.620 | *           | -1.338 | -0.252              | *      | -0.054 | 0.041  |        |   |
| Species effect               |                       | Θ <i>E. grandiflora</i> | 1.017       | 2.051  | *           | 0.428  | 2.640               | *      | -0.121 | 0.077  |        |   |
|                              |                       | Θ <i>E. falcata</i>     | -2.051      | -1.017 | *           | -2.640 | -0.428              | *      | -0.077 | 0.121  |        |   |
| Habitat-of-provenance effect | <i>E. falcata</i>     | Θ Hilltop               | -0.284      | 0.134  |             | -0.569 | 0.131               |        | -0.049 | 0.015  |        |   |
|                              |                       | Θ Slope                 | -0.597      | -0.155 | *           | -0.750 | -0.043              | *      | -0.024 | 0.041  |        |   |
|                              |                       | Θ Bottomland            | 0.216       | 0.658  | *           | 0.262  | 1.019               | *      | -0.023 | 0.043  |        |   |
|                              | <i>E. grandiflora</i> | Θ Hilltop               | -0.522      | 0.434  |             | -1.333 | 0.299               |        | -0.125 | 0.021  |        |   |
|                              |                       | Θ Slope                 | -0.887      | -0.046 | *           | -0.842 | 0.597               |        | 0.016  | 0.145  | *      |   |
|                              |                       | Θ Bottomland            | -0.102      | 1.092  |             | -0.231 | 1.687               |        | -0.109 | 0.061  |        |   |
| Family effect                | <i>E. falcata</i>     | Bottomland              | Θ family1   | -1.993 | 0.597       |        | -4.334              | -0.330 | *      | -0.404 | -0.045 | * |
|                              |                       |                         | Θ family2   | -0.156 | 1.272       |        | -0.600              | 2.638  |        | -0.141 | 0.163  |   |
|                              |                       |                         | Θ family3   | -0.615 | 0.502       |        | -0.140              | 2.212  |        | 0.050  | 0.260  | * |
|                              |                       |                         | Θ family4   | -1.374 | 0.730       |        | -2.567              | 0.814  |        | -0.124 | 0.166  |   |
|                              |                       |                         | Θ family5   | -0.903 | 1.488       |        | -1.160              | 2.230  |        | -0.075 | 0.232  |   |
|                              |                       |                         | Θ family6   | 0.806  | 1.999       | *      | 0.786               | 3.862  | *      | -0.055 | 0.229  |   |
|                              |                       |                         | Θ family7   | -1.403 | 0.079       |        | -2.265              | 0.970  |        | -0.192 | 0.098  |   |
|                              |                       |                         | Θ family8   | -1.055 | 0.119       |        | -1.900              | 0.690  |        | -0.216 | 0.013  |   |
|                              |                       |                         | Θ family9   | -0.865 | 1.250       |        | -1.728              | 1.414  |        | -0.148 | 0.129  |   |
|                              |                       |                         | Θ family10  | -0.866 | 0.099       |        | -1.432              | 0.855  |        | -0.056 | 0.145  |   |
|                              |                       | Slope                   | Θ family11  | -1.170 | 0.806       |        | -1.065              | 2.094  |        | -0.020 | 0.259  |   |
|                              |                       |                         | Θ family12  | -0.027 | 1.925       |        | -0.299              | 2.783  |        | -0.125 | 0.137  |   |
|                              |                       |                         | Θ family13  | -2.505 | -0.773      | *      | -3.370              | -0.124 | *      | -0.281 | 0.010  |   |
|                              |                       |                         | Θ family14  | 0.051  | 3.251       | *      | -0.261              | 4.658  |        | -0.214 | 0.234  |   |
|                              |                       |                         | Θ family15  | -1.416 | 0.456       |        | -2.031              | 0.966  |        | -0.141 | 0.125  |   |
|                              |                       |                         | Θ family16  | -2.434 | 0.302       |        | -2.864              | 1.549  |        | -0.127 | 0.246  |   |
|                              |                       |                         | Θ family17  | -1.070 | -0.054      | *      | -2.281              | -0.051 | *      | -0.115 | 0.075  |   |
|                              |                       |                         | Θ family18  | 0.180  | 1.543       | *      | -0.722              | 2.165  |        | -0.150 | 0.118  |   |
|                              |                       |                         | Θ family19  | -0.093 | 1.163       |        | 0.214               | 3.193  | *      | 0.022  | 0.279  | * |
|                              |                       |                         | Θ family20  | -0.529 | 0.620       |        | -2.019              | 0.312  |        | -0.205 | 0.004  |   |
|                              |                       |                         | Θ family21  | -0.277 | 1.828       |        | -0.941              | 2.662  |        | -0.195 | 0.117  |   |
|                              |                       |                         | Θ family22  | 0.437  | 1.620       | *      | -0.958              | 1.683  |        | -0.111 | 0.120  |   |
|                              |                       |                         | Θ family23  | -1.320 | -0.139      | *      | -1.641              | 0.784  |        | -0.047 | 0.162  |   |
|                              |                       |                         | Θ family24  | -1.643 | -0.488      | *      | -3.048              | -0.291 | *      | -0.174 | 0.066  |   |
|                              | Hilltop               | Θ family25              | 0.185       | 1.382  | *           | -0.191 | 2.543               |        | -0.035 | 0.220  |        |   |
|                              |                       | Θ family26              | -1.483      | 0.579  |             | -2.006 | 1.219               | *      | -0.102 | 0.196  |        |   |
|                              |                       | Θ family27              | 0.956       | 2.357  | *           | 0.536  | 3.543               | *      | -0.146 | 0.129  |        |   |
|                              |                       | Θ family28              | -1.330      | 0.054  |             | -2.383 | 0.663               |        | -0.139 | 0.137  |        |   |
|                              |                       | Θ family29              | -0.740      | 1.384  |             | -1.905 | 1.500               |        | -0.238 | 0.066  |        |   |
|                              |                       | Θ family30              | -1.904      | -0.868 | *           | -3.123 | -0.343              | *      | -0.183 | 0.062  |        |   |
|                              |                       | Θ family31              | -0.444      | 0.618  |             | -0.746 | 1.455               |        | -0.081 | 0.114  |        |   |
|                              |                       | Θ family32              | -0.574      | 0.798  |             | -0.783 | 1.881               |        | -0.036 | 0.202  |        |   |
|                              |                       | Θ family33              | -0.375      | 2.184  |             | -1.582 | 2.507               |        | -0.236 | 0.111  |        |   |
|                              |                       | Θ family34              | -2.037      | -0.714 | *           | -2.964 | -0.231              | *      | -0.156 | 0.091  |        |   |
|                              | <i>E. grandiflora</i> | Bottom.                 | Θ family35  | -1.060 | 0.660       |        | -2.713              | -0.015 | *      | -0.243 | 0.005  |   |
|                              |                       |                         | Θ family36  | -0.660 | 1.060       |        | 0.015               | 2.713  | *      | -0.005 | 0.243  |   |
|                              |                       | Slope                   | Θ family37  | 0.688  | 2.257       | *      | 0.841               | 3.316  | *      | -0.022 | 0.195  |   |
|                              |                       |                         | Θ family38  | -0.561 | 0.633       |        | -1.308              | 1.069  |        | -0.129 | 0.089  |   |
|                              |                       |                         | Θ family39  | -0.910 | 0.473       |        | -0.367              | 1.699  |        | 0.044  | 0.224  | * |
|                              |                       |                         | Θ family40  | -1.391 | 0.499       |        | -2.599              | 0.473  |        | -0.246 | 0.009  |   |
|                              |                       |                         | Θ family41  | -1.459 | -0.159      | *      | -2.792              | -0.482 | *      | -0.181 | 0.026  |   |
|                              |                       |                         | Θ family42  | -1.246 | 0.107       |        | -1.634              | 0.757  |        | -0.066 | 0.154  |   |
|                              |                       | Hilltop                 | Θ family43  | -0.201 | 1.439       |        | -0.053              | 2.544  |        | -0.028 | 0.201  |   |
|                              |                       |                         | Θ family44  | -1.030 | 0.968       |        | -2.344              | 0.732  |        | -0.266 | -0.006 | * |
| Seed mass                    | <i>E. falcata</i>     | Θ Seed mass             | 0.421       | 0.521  | *           | 0.426  | 0.643               | *      | 0.001  | 0.020  | *      |   |
|                              | <i>E. grandiflora</i> | Θ Seed mass             | 0.037       | 0.061  | *           | 0.025  | 0.079               | *      | -0.001 | 0.003  |        |   |

TABLE S6. Parameters estimated by the Bayesian analysis of phenotypic value decomposition for leaf traits.

|                              |                       | LMA 18                  |             | LMA 24 |        | %N 18   |        | %C 18  |        | Amax 18 |          | $\delta^{13}C$ 18 |        |        |        |        |        |        |        |        |   |
|------------------------------|-----------------------|-------------------------|-------------|--------|--------|---------|--------|--------|--------|---------|----------|-------------------|--------|--------|--------|--------|--------|--------|--------|--------|---|
|                              |                       | 2.5                     | 97.5        | 2.5    | 97.5   | 2.5     | 97.5   | 2.5    | 97.5   | 2.5     | 97.5     | 2.5               | 97.5   |        |        |        |        |        |        |        |   |
|                              |                       |                         |             |        |        |         |        |        |        |         |          |                   |        |        |        |        |        |        |        |        |   |
| Year effect                  |                       | Ø2006                   | 3.682       | 6.592  | 2.955  | 8.190   | *      | -0.134 | -0.018 | *       | -0.430   | -0.122            | *      | -0.938 | -0.320 | *      | -0.024 | 0.433  |        |        |   |
|                              |                       | Ø2007                   | 0.066       | 2.205  | *      | -4.925  | -1.292 | *      | 0.181  | 0.264   | *        | -0.149            | 0.083  | *      | 0.536  | 0.083  | *      | -0.121 | 0.205  |        |   |
|                              |                       | Ø2008                   | -7.123      | -5.484 | *      | -4.181  | -0.910 | *      | -0.182 | -0.111  | *        | 0.221             | 0.409  | *      | 0.155  | 0.497  | *      | -0.372 | -0.120 | *      |   |
| Species effect               |                       | Ø <i>E. grandiflora</i> | 8.887       | 12.610 | *      | 8.169   | 14.350 | *      | -0.261 | -0.117  | *        | -0.229            | 0.149  | *      | -0.415 | 0.338  | *      | -0.273 | 0.314  |        |   |
|                              |                       | Ø <i>E. falcata</i>     | -12.610     | -8.887 | *      | -14.350 | -8.169 | *      | 0.117  | 0.261   | *        | -0.149            | 0.229  | *      | -0.338 | 0.415  | *      | -0.314 | 0.273  |        |   |
| Habitat-of-provenance effect | <i>E. falcata</i>     | Ø Hilltop               | -0.669      | 0.835  |        | -1.332  | 0.790  |        | -0.006 | 0.052   |          | 0.012             | 0.163  | *      | -0.221 | 0.087  |        | -0.073 | 0.136  |        |   |
|                              |                       | Ø Slope                 | -1.398      | 0.168  |        | -2.316  | -0.110 | *      | -0.005 | 0.052   |          | -0.121            | 0.024  |        | -0.267 | 0.068  |        | -0.315 | -0.107 | *      |   |
|                              |                       | Ø Bottomland            | -0.286      | 1.335  |        | 0.363   | 2.672  | *      | -0.077 | -0.017  | *        | -0.120            | 0.037  |        | -0.003 | 0.334  | *      | 0.076  | 0.291  | *      |   |
|                              | <i>E. grandiflora</i> | Ø Hilltop               | -0.435      | 3.155  |        | -1.648  | 2.795  |        | -0.036 | 0.109   |          | -0.074            | 0.317  |        | -0.995 | -0.246 | *      | -0.454 | 0.106  |        |   |
|                              |                       | Ø Slope                 | -3.226      | -0.193 | *      | -2.781  | 1.359  |        | -0.002 | 0.121   |          | -0.147            | 0.173  |        | -0.135 | 0.471  |        | -0.394 | 0.051  |        |   |
|                              |                       | Ø Bottomland            | -1.867      | 2.414  |        | -2.560  | 2.921  |        | -0.181 | -0.006  | *        | -0.355            | 0.098  |        | 0.012  | 0.872  | *      | 0.060  | 0.692  | *      |   |
| Family effect                | <i>E. falcata</i>     | Bottomland              | Ø family1   | -5.785 | 4.044  |         | -5.865 | 6.779  |        | -0.066  | 0.292    |                   | -0.723 | 0.205  |        | -1.176 | 0.795  |        | -1.049 | 0.235  |   |
|                              |                       |                         | Ø family2   | -1.273 | 4.221  |         | -5.293 | 4.195  |        | -0.191  | 0.018    |                   | -0.556 | -0.010 |        | -0.199 | 0.853  |        | -0.514 | 0.265  |   |
|                              |                       |                         | Ø family3   | -0.063 | 3.841  |         | -3.450 | 3.429  |        | -0.066  | 0.080    |                   | -0.176 | 0.205  |        | -0.732 | 0.088  |        | -0.607 | -0.036 | * |
|                              |                       |                         | Ø family4   | -7.451 | 0.867  |         | 0.928  | 10.820 | *      | -0.237  | 0.051    |                   | -0.308 | 0.439  |        | -0.947 | 0.615  |        | -0.463 | 0.636  |   |
|                              |                       |                         | Ø family5   | -6.530 | 1.735  |         | -9.190 | 0.763  |        | -0.195  | 0.104    |                   | -0.030 | 0.739  |        | -0.966 | 0.782  |        | 0.140  | 1.182  |   |
|                              |                       |                         | Ø family6   | -2.481 | 1.782  |         | -1.144 | 7.803  |        | 0.018   | 0.176    | *                 | 0.137  | 0.552  | *      | -0.019 | 0.888  |        | 0.099  | 0.706  | * |
|                              |                       |                         | Ø family7   | -4.555 | 0.840  |         | -6.981 | 2.388  |        | -0.108  | 0.103    |                   | -0.047 | 0.501  |        | -1.055 | 0.049  |        | -0.370 | 0.387  |   |
|                              |                       |                         | Ø family8   | -2.000 | 2.079  |         | -6.564 | 1.425  |        | -0.104  | 0.060    |                   | -0.330 | 0.092  |        | -0.609 | 0.196  |        | -0.550 | 0.005  |   |
|                              |                       |                         | Ø family9   | 0.977  | 8.571  | *       | -4.175 | 4.842  |        | -0.197  | 0.091    |                   | -0.501 | 0.245  |        | -0.569 | 0.902  |        | -0.589 | 0.518  |   |
|                              |                       |                         | Ø family10  | -1.475 | 2.184  |         | -3.904 | 2.583  |        | 0.017   | 0.159    | *                 | -0.394 | -0.022 | *      | 0.178  | 0.887  | *      | -0.301 | 0.208  |   |
|                              |                       | Ø family11              | -3.461      | 3.557  |        | -7.571  | 0.857  |        | -0.008 | 0.255   |          | 0.056             | 0.741  | *      | -0.805 | 0.570  |        | 0.009  | 0.931  | *      |   |
|                              |                       | Ø family12              | -8.027      | -1.005 | *      | -10.110 | -1.579 | *      | NA     | NA      |          | NA                | NA     |        | -0.723 | 0.727  |        | NA     | NA     |        |   |
|                              |                       | Ø family13              | -2.873      | 3.777  |        | -3.443  | 5.727  |        | -0.222 | 0.034   |          | -0.109            | 0.561  |        | -1.780 | -0.462 | *      | -0.774 | 0.179  |        |   |
|                              |                       | Ø family14              | -11.400     | 0.654  |        | -8.290  | 6.163  |        | NA     | NA      |          | NA                | NA     |        | -0.014 | 2.374  | NA     | NA     | NA     |        |   |
|                              |                       | Ø family15              | -1.983      | 4.952  |        | -0.403  | 7.813  |        | 0.068  | 0.322   | *        | -0.442            | 0.219  |        | -0.773 | 0.621  |        | -0.652 | 0.319  |        |   |
|                              |                       | Ø family16              | -4.419      | 5.727  |        | 1.028   | 12.790 |        | -0.216 | 0.187   |          | -0.347            | 0.685  |        | -1.252 | 0.907  |        | -0.668 | 0.751  |        |   |
|                              |                       | Ø family17              | -2.467      | 1.270  |        | -7.183  | -1.255 | *      | -0.098 | 0.046   |          | -0.455            | -0.078 | *      | -0.359 | 0.406  |        | -0.424 | 0.092  |        |   |
|                              |                       | Ø family18              | -4.799      | -0.220 | *      | -2.563  | 6.226  |        | -0.131 | 0.063   |          | -0.173            | 0.339  |        | 0.323  | 1.284  | *      | 0.001  | 0.719  | *      |   |
|                              |                       | Ø family19              | 0.609       | 5.326  | *      | -4.255  | 4.201  |        | 0.084  | 0.243   | *        | -0.242            | 0.169  |        | -0.419 | 0.550  |        | -0.320 | 0.306  |        |   |
|                              |                       | Ø family20              | 0.392       | 4.599  | *      | -0.300  | 6.583  |        | -0.316 | -0.134  | *        | -0.851            | -0.368 | *      | -0.743 | 0.088  |        | -0.444 | 0.177  |        |   |
|                              |                       | Ø family21              | -3.304      | 4.766  |        | -8.277  | 1.581  |        | NA     | NA      |          | NA                | NA     |        | -0.787 | 0.733  |        | NA     | NA     |        |   |
|                              |                       | Ø family22              | 2.365       | 6.833  | *      | 0.344   | 8.267  | *      | -0.131 | 0.029   |          | -0.037            | 0.386  |        | 0.109  | 0.995  | *      | 0.215  | 0.793  | *      |   |
|                              | Ø family23            | -0.501                  | 3.402       |        | -4.239 | 2.765   |        | -0.133 | 0.010  |         | -0.328   | 0.042             |        | -0.609 | 0.197  |        | -0.361 | 0.180  |        |        |   |
|                              | Ø family24            | -3.780                  | 0.277       |        | -6.069 | 1.475   |        | -0.049 | 0.093  |         | -0.078   | 0.298             |        | -0.965 | -0.153 | *      | -0.731 | -0.209 | *      |        |   |
|                              | Ø family25            | -2.244                  | 2.310       |        | -2.142 | 5.531   |        | -0.079 | 0.108  |         | -0.097   | 0.394             |        | 0.171  | 1.027  | *      | -0.116 | 0.596  |        |        |   |
|                              | Ø family26            | -8.222                  | -0.902      | *      | -4.695 | 4.514   |        | -0.369 | -0.089 | *       | -0.474   | 0.276             |        | -0.786 | 0.713  |        | -0.678 | 0.352  |        |        |   |
|                              | Ø family27            | -1.716                  | 3.444       |        | -5.408 | 3.260   |        | -0.005 | 0.195  |         | -0.514   | 0.015             |        | -0.023 | 0.998  |        | 0.197  | 0.968  | *      |        |   |
|                              | Ø family28            | -4.321                  | 0.556       |        | -5.537 | 2.693   |        | -0.029 | 0.170  |         | -0.035   | 0.497             |        | -0.409 | 0.613  |        | -0.357 | 0.372  |        |        |   |
|                              | Ø family29            | -0.372                  | 7.163       |        | -4.799 | 5.103   |        | -0.182 | 0.101  |         | -0.308   | 0.518             |        | -0.607 | 0.978  |        | -0.517 | 0.539  |        |        |   |
|                              | Ø family30            | -3.181                  | 0.917       |        | -4.275 | 3.874   |        | -0.131 | 0.019  |         | -0.434   | -0.044            | *      | -0.937 | -0.161 | *      | -0.814 | -0.237 | *      |        |   |
|                              | Ø family31            | 0.226                   | 3.905       | *      | -2.940 | 3.268   |        | -0.024 | 0.118  |         | -0.113   | 0.259             |        | -0.555 | 0.220  |        | -0.561 | -0.040 | *      |        |   |
|                              | Ø family32            | 0.586                   | 5.464       | *      | -2.433 | 4.924   |        | 0.093  | 0.271  | *       | 0.215    | 0.675             | *      | -0.216 | 0.777  |        | -0.180 | 0.449  |        |        |   |
|                              | Ø family33            | -5.435                  | 4.357       |        | -6.077 | 5.709   |        | -0.240 | 0.138  |         | -0.607   | 0.299             |        | -1.385 | 0.478  |        | 0.011  | 1.351  | *      |        |   |
|                              | Ø family34            | -3.632                  | 1.091       |        | -3.988 | 3.595   |        | -0.137 | 0.050  |         | -0.534   | -0.048            | *      | -0.941 | 0.100  |        | -1.075 | -0.418 | *      |        |   |
|                              | <i>E. grandiflora</i> | Bottom.                 | Ø family35  | -4.501 | 1.430  |         | -5.116 | 2.574  |        | -0.227  | 0.028    |                   | -0.801 | -0.139 | *      | -0.623 | 0.590  |        | -0.466 | 0.437  |   |
|                              |                       |                         | Ø family36  | -1.430 | 4.501  |         | -2.574 | 5.116  |        | -0.028  | 0.227    |                   | 0.139  | 0.801  | *      | -0.590 | 0.623  |        | -0.437 | 0.466  |   |
|                              |                       | Slope                   | Ø family37  | -3.346 | 2.433  |         | -3.336 | 3.605  |        | -0.163  | 0.064    |                   | -0.076 | 0.526  |        | -0.557 | 0.622  |        | -0.256 | 0.574  |   |
|                              |                       |                         | Ø family38  | -3.017 | 1.046  |         | -2.093 | 4.944  |        | -0.042  | 0.117    |                   | 0.139  | 0.559  | *      | -0.649 | 0.206  |        | 0.188  | 0.735  | * |
|                              |                       |                         | Ø family39  | -4.710 | 0.202  |         | -8.308 | -2.434 |        | -0.096  | 0.098    |                   | -0.220 | 0.305  |        | 0.145  | 1.096  | *      | -0.672 | 0.049  |   |
|                              |                       |                         | Ø family40  | -0.547 | 6.007  |         | 0.564  | 8.732  | *      | -0.217  | 0.043    |                   | -0.542 | 0.129  |        | -1.288 | 0.094  |        | -0.374 | 0.612  |   |
|                              |                       | Ø family41              | -1.688      | 3.260  |        | -4.110  | 2.924  |        | 0.009  | 0.194   | *        | -0.662            | -0.154 | *      | -0.342 | 0.631  |        | -0.764 | -0.111 | *      |   |
|                              |                       | Hilltop                 | Ø family42  | -2.383 | 2.714  |         | -3.304 | 3.414  |        | -0.054  | 0.142    |                   | -0.094 | 0.421  |        | -0.575 | 0.404  |        | -0.047 | 0.648  |   |
|                              |                       |                         | Ø family43  | -3.406 | 2.306  |         | -1.236 | 5.949  |        | -0.096  | 0.141    |                   | 0.060  | 0.668  | *      | -1.116 | 0.042  |        | -0.496 | 0.336  |   |
|                              |                       |                         | Ø family44  | -3.356 | 3.963  |         | -6.942 | 2.082  |        | -0.203  | 0.057    |                   | -0.910 | -0.188 |        | -0.082 | 1.330  |        | -0.718 | 0.255  |   |
| Seed mass                    | <i>E. falcata</i>     | Ø Seed mass             | 0.289       | 0.661  | *      | 0.850   | *      | -0.003 | 0.011  |         | 0.005    | 0.042             | *      | 0.006  | 0.079  | *      | 0.096  | 0.149  | *      |        |   |
|                              |                       | <i>E. grandiflora</i>   | Ø Seed mass | 0.054  | 0.142  | *       | 0.000  | 0.145  | *      | -0.003  | 3.86E-04 |                   | -0.002 | 0.006  | *      | -0.009 | 0.009  |        | 0.006  | 0.019  | * |



TABLE S7. Progeny effect variance estimates ( $h^2_M$ ) for plant-level and leaf-level traits under the three hypotheses (full-sibs, mixture and half-sibs) with their 0.025 and 0.975 credible intervals.

|                    |                              | <i>Eperua falcata</i> |        |         |                   |        |         |                     |        |         | <i>Eperua grandiflora</i> |        |         |                   |        |         |                     |        |         |
|--------------------|------------------------------|-----------------------|--------|---------|-------------------|--------|---------|---------------------|--------|---------|---------------------------|--------|---------|-------------------|--------|---------|---------------------|--------|---------|
|                    |                              | $h^2_M$ (full-sibs)   |        |         | $h^2_M$ (mixture) |        |         | $h^2_M$ (half-sibs) |        |         | $h^2_M$ (full-sibs)       |        |         | $h^2_M$ (mixture) |        |         | $h^2_M$ (half-sibs) |        |         |
|                    |                              | 2.5 CI                | median | 97.5 CI | 2.5 CI            | median | 97.5 CI | 2.5 CI              | median | 97.5 CI | 2.5 CI                    | median | 97.5 CI | 2.5 CI            | median | 97.5 CI | 2.5 CI              | median | 97.5 CI |
| Plant-level traits | <u>Dimensions</u>            |                       |        |         |                   |        |         |                     |        |         |                           |        |         |                   |        |         |                     |        |         |
|                    | Height (6 months)            | 1.10                  | 9.50   | 21.40   | 1.70              | 14.20  | 32.10   | 2.30                | 19.00  | 42.80   | 0.001                     | 0.40   | 23.90   | 0.002             | 0.60   | 35.90   | 0.002               | 0.80   | 47.90   |
|                    | Height (12 months)           | 8.40                  | 19.10  | 37.50   | 12.70             | 28.60  | 56.30   | 16.90               | 38.10  | 75.10   | 0.005                     | 11.10  | 51.80   | 0.01              | 16.70  | 77.70   | 0.01                | 22.30  | 103.60  |
|                    | Height (18 months)           | 9.90                  | 20.20  | 41.00   | 14.80             | 30.30  | 61.50   | 19.70               | 40.40  | 82.10   | 0.70                      | 25.90  | 80.10   | 1.00              | 38.80  | 120.10  | 1.30                | 51.70  | 160.10  |
|                    | Height (24 months)           | 3.10                  | 13.80  | 31.30   | 4.70              | 20.70  | 47.00   | 6.20                | 27.70  | 62.60   | 8.00                      | 39.30  | 99.00   | 11.90             | 58.90  | 148.50  | 15.90               | 78.60  | 198.00  |
|                    | Growth rate (6-12 months)    | 6.90                  | 16.40  | 35.10   | 10.30             | 24.60  | 52.70   | 13.80               | 32.70  | 70.30   | 0.60                      | 18.10  | 65.40   | 0.90              | 27.20  | 98.10   | 1.20                | 36.30  | 130.80  |
|                    | Growth rate (12-18 months)   | 1.70                  | 6.90   | 17.80   | 2.50              | 10.30  | 26.80   | 3.30                | 13.70  | 35.70   | 0.50                      | 23.50  | 75.50   | 0.70              | 35.30  | 113.20  | 0.90                | 47.00  | 151.00  |
|                    | Growth rate (18-24 months)   | 0.02                  | 2.30   | 14.40   | 0.02              | 3.50   | 21.60   | 0.03                | 4.60   | 28.80   | 0.04                      | 11.10  | 57.40   | 0.10              | 16.60  | 86.00   | 0.10                | 22.20  | 114.70  |
|                    | Diameter (18 months)         | 2.50                  | 17.10  | 38.20   | 3.80              | 25.60  | 57.20   | 5.00                | 34.10  | 76.30   | 0.10                      | 8.30   | 41.10   | 0.10              | 12.40  | 61.60   | 0.20                | 16.60  | 82.10   |
|                    | Diameter (24 months)         | 4.50                  | 15.10  | 31.90   | 6.80              | 22.60  | 47.80   | 9.00                | 30.10  | 63.70   | 0.10                      | 9.80   | 50.20   | 0.10              | 14.70  | 75.30   | 0.10                | 19.60  | 100.30  |
|                    | Radial growth (18-24 months) | 0.40                  | 5.30   | 17.10   | 0.60              | 7.90   | 25.60   | 0.80                | 10.50  | 34.10   | 0.10                      | 12.50  | 56.90   | 0.20              | 18.70  | 85.30   | 0.20                | 25.00  | 113.70  |
|                    | <u>Biomass</u>               |                       |        |         |                   |        |         |                     |        |         |                           |        |         |                   |        |         |                     |        |         |
|                    | Total mass (24 months)       | 8.40                  | 19.50  | 38.50   | 12.50             | 29.30  | 57.70   | 16.70               | 39.10  | 76.90   | 4.40                      | 33.90  | 91.90   | 6.60              | 50.90  | 137.90  | 8.80                | 67.90  | 183.90  |
|                    | Root mass (24 months)        | 8.20                  | 18.90  | 37.40   | 12.30             | 28.30  | 56.00   | 16.50               | 37.80  | 74.70   | 0.10                      | 21.10  | 72.30   | 0.20              | 31.70  | 108.40  | 0.30                | 42.20  | 144.50  |
|                    | Leaf mass (24 months)        | 4.40                  | 18.10  | 37.90   | 6.60              | 27.20  | 56.80   | 8.80                | 36.20  | 75.80   | 3.70                      | 41.70  | 105.30  | 5.50              | 62.50  | 157.90  | 7.30                | 83.30  | 210.60  |
|                    | LMR (24 months)              | 0.80                  | 9.40   | 22.30   | 1.20              | 14.20  | 33.50   | 1.60                | 18.90  | 44.70   | 0.10                      | 13.40  | 57.80   | 0.10              | 20.10  | 86.60   | 0.10                | 26.80  | 115.50  |
|                    | RMR (24 months)              | 1.30                  | 13.50  | 30.10   | 2.00              | 20.20  | 45.10   | 2.60                | 27.00  | 60.20   | 0.10                      | 12.70  | 52.00   | 0.10              | 19.00  | 78.10   | 0.20                | 25.40  | 104.10  |
|                    | Leaf surface (24 months)     | 3.10                  | 16.00  | 35.00   | 4.60              | 24.00  | 52.50   | 6.10                | 32.00  | 70.00   | 12.00                     | 50.90  | 115.70  | 18.10             | 76.30  | 173.50  | 24.10               | 101.80 | 231.40  |
|                    | LAR (24 months)              | 0.01                  | 4.60   | 16.00   | 0.02              | 7.00   | 23.90   | 0.02                | 9.30   | 31.90   | 0.003                     | 2.40   | 33.50   | 0.005             | 3.50   | 50.20   | 0.01                | 4.70   | 66.90   |
|                    | LMA (18 months)              | 0.20                  | 3.60   | 11.30   | 0.30              | 5.40   | 17.00   | 0.40                | 7.20   | 22.70   | ~0                        | 0.04   | 5.20    | 0.0001            | 0.10   | 7.80    | 0.0001              | 0.10   | 10.40   |
|                    | LMA (24 months)              | 0.01                  | 2.50   | 12.00   | ~0                | 3.70   | 18.00   | 0.01                | 4.90   | 24.10   | 0.002                     | 0.60   | 23.10   | 0.002             | 0.80   | 34.70   | 0.003               | 1.10   | 46.20   |
|                    | N (18 months)                | 0.70                  | 9.40   | 25.30   | 1.00              | 14.10  | 37.90   | 1.30                | 18.80  | 50.50   | 0.02                      | 6.50   | 57.10   | 0.03              | 9.80   | 85.60   | 0.04                | 13.10  | 114.20  |
|                    | C (18 months)                | 1.60                  | 15.60  | 34.40   | 2.50              | 23.40  | 51.60   | 3.30                | 31.10  | 68.80   | 0.001                     | 0.20   | 4.40    | 0.001             | 0.30   | 6.50    | 0.001               | 0.40   | 8.70    |
|                    | Amax(18 months)              | 1.10                  | 8.90   | 20.90   | 1.60              | 13.40  | 31.40   | 2.10                | 17.80  | 41.90   | 2.20                      | 32.80  | 87.40   | 3.30              | 49.20  | 131.00  | 4.40                | 65.50  | 174.70  |
|                    | d13C (18 months)             | 2.20                  | 12.50  | 30.40   | 3.30              | 18.70  | 45.60   | 4.40                | 24.90  | 60.90   | 0.10                      | 10.40  | 69.90   | 0.20              | 15.70  | 104.90  | 0.20                | 20.90  | 139.80  |
